# Supplementary material
Source: Elsevier journal article supplement (https://rcastoragev2.blob.core.windows.net/8caf7f359038efd2e97b1776cc13e590/mmc1.pdf)

### Supplementary Table 1: Search strategy MEDLINE

- 1 influenza.mp. or Influenza, Human/
- 2 exp Influenza A virus/
- 3 Influenza, Human/ep, mo
- 4 flu.mp.
- 5 or/1-4
- 6 exp risk/
- 7 exp epidemics/ or pandemics/
- 8 (pandemic\* or epidemic\*).mp.
- 9 exp Mortality/
- 10 exp Morbidity/
- 11 morbidit\*.ti.
- 12 ((mortality or risk or risks or morbidit\* or severe or severity) adj7 influenza).mp.
- 13 Susceptibil:.ti. and influenza.mp.
- 14 (Susceptibl\* and influenza).mp.
- 15 Death/
- 16 Disease Outbreaks/
- 17 exp Hospitalization/
- 18 risk factor\*.mp.
- 19 exp Disease Transmission, Infectious/
- 20 (risk or risks or mortality).ti.
- 21 or/6-20
- 22 5 and 21

- 23 22 or 3
- 24 animals/ not humans/
- 25 23 not 24

The search strategies for the other databases were adapted from the MEDLINE search strategy and are available by request.

.

**Supplementary Table 2:** Study characteristics of the 142 included studies (non-ecological studies)

|                                               | <i>Overall</i> | <i>Pandemic influenza</i> <sup>†</sup> | <i>Seasonal influenza</i> <sup>†</sup> |
|-----------------------------------------------|----------------|----------------------------------------|----------------------------------------|
| Range of year of publication                  | 1918 – 2014    | 1918 – 2011                            | 2010-2014                              |
| Number of studies                             | 142            | 136                                    | 17                                     |
| Number of participants                        | 310,597        | 303,452                                | 14,336                                 |
| Cohort studies, n (%)                         | 138 (97.2)     | 132 (97.1)                             | 17 (100.0)                             |
| Laboratory confirmation of influenza, n (%)   | 139 (97.9)     | 133 (97.8)                             | 17 (100.0)                             |
| Newcastle-Ottawa Scale points, median (range) | 6 (3-8)        | 6 (3-8)                                | 7 (5-7)                                |

<sup>†</sup> 11 studies reported on both, pandemic and seasonal influenza

### Supplementary Table 3: References of all 142 individual level studies [1-145]

- [1] Abdelaty NM. Risk factors and prognostic criteria in 230 patients with influenza A (H1N1) infection. *Egyptian Journal of Chest Diseases and Tuberculosis*. 2013;62:1-8.
- [2] Adeniji KA, Cusack R. The Simple Triage Scoring System (STSS) successfully predicts mortality and critical care resource utilization in H1N1 pandemic flu: a retrospective analysis. *Crit Care*. 2011;15:R39.
- [3] Adlhoch C, Wadl M, Behnke M, Pena Diaz LA, Clausmeyer J, Eckmanns T. Pandemic influenza A(H1)pdm09 in hospitals and intensive care units - results from a new hospital surveillance, Germany 2009/2010. *Influenza other respi*. 2012;6:e162-8.
- [4] Identification of epidemic wave of A H1N1 influenza summer in the city of Valencia. [Spanish] Identificacion de la onda epidemica estival por Gripe An H1N1 en la ciudad de Valencia. *Boletin Epidemiologico Semanal*. 2009;17:133-6.
- [5] Agha A, Alrawi A, Munayco CV, Alayed MS, Al-Hakami M, Korairi H, et al. Characteristics of Patients Hospitalized with 2009 H1N1 Influenza in a Tertiary Care Hospital in Southern Saudi Arabia. *Mediterr*. 2012;4:e2012002.
- [6] Ahmad AS, Puttaswamy C, Mudasser S, Abdelaziz O. Clinical Presentation and Outcome in Hospitalized Patients of 2009 Pandemic Influenza A (H1N1) viral infection in Oman. *Oman med*. 2011;26:329-36.
- [7] Akinci E, Kayaaslan B, Yetkin MA, Yilmaz S, Aliravci ID, Yildiz S, et al. Analysis of 113 hospitalized patients with confirmed 2009 influenza a (H1N1) virus infection. [Turkish] 2009 influenza A (H1N1) enfeksiyonu tani{dotless}si{dotless}yla yati{dotless}ri{dotless}lan 113 hastani{dotless}n analizi. *Turkish Journal of Medical Sciences*. 2011;41:507-14.
- [8] Akinci E, Kayaaslan BU, Yetkin MA, Yilmaz S, Aliravci D, Yildiz S, et al. Evaluation of H1N1 pandemic influenza cases hospitalized in an infectious diseases clinic. *Clinical Microbiology and Infection*. 2010;16:S711-S2.
- [9] Al-Lawati J, Al-Tamtami N, Al-Qasmi A, Al-Jardani A, Al-Abri S, Al Busaidy S. Hospitalised patients with Influenza A (H1N1) in the Royal Hospital, Oman: Experience of a tertiary care hospital, July-December 2009. *Sultan Qaboos Univ Med J*. 2010;10:326-34.
- [10] Athanasiou M, Baka A, Andreopoulou A, Spala G, Karageorgou K, Kostopoulos L, et al. Influenza surveillance during the post-pandemic influenza 2010/11 season in Greece, 04 October 2010 to 22 May 2011. *Euro Surveill*. 2011;16.
- [11] Ayatollahi J, Golestan M, Sharifi MR, Esform E, Shahcheraghi SH. The frequency distribution of cases affected by influenza A (H1N1) based on demographic characteristics during 2008-2009 in Yazd Province(Iran). *Jundishapur Journal of Microbiology*. 2013;6.
- [12] Barakat A, Ihazmad H, El Falaki F, Tempia S, Cherkaoui I, El Aouad R. 2009 Pandemic influenza A virus subtype H1N1 in Morocco, 2009-2010: epidemiology, transmissibility, and factors associated with fatal cases. *J Infect Dis*. 2012;206 Suppl 1:S94-100.
- [13] Bergman H, Livornese LL, Jr., Sambhara S, Santoro J, Dessain SK. Patients Hospitalized with pH1N1 Influenza in an Academic Community Medical Center. *Open Respir Med J*. 2011;5:19-23.
- [14] Blakemore SP, Gopalan PD. Pandemic influenza A (H1N1) 2009: A case series from intensive care units in port Shepstone, South Africa. *Southern African Journal of Anaesthesia and Analgesia*. 2010;16:17-22.
- [15] Bonastre J, Suberviola B, Pozo JC, Guerrero JE, Torres A, Rodriguez A, et al. Extracorporeal lung support in patients with severe respiratory failure secondary to the 2010-2011 winter seasonal outbreak of influenza A (H1N1) in Spain. [Spanish] Uso de oxigenador de membrana extracorporeo en pacientes con insuficiencia respiratoria aguda grave refractaria en la epidemia de gripe estacional 2010-2011 por influenza A (H1N1) en Espana. *Medicina Intensiva*. 2012;36:193-9.
- [16] Borse RT, Kadam DB, Sangle SA, Basavraj A, Prasad HB, Umarji PB, et al. Comparison of demographic, clinical, radiological characteristics and comorbidities in mechanically ventilated and nonventilated, adult

patients admitted in ICU with confirmed diagnosis of influenza A (H1N1). *J Assoc Physicians India*. 2013;61:887-93.

[17] Brandsaeter BJ, Pillgram M, Berild D, Kjekshus H, Kran AM, Bergersen BM. Hospitalised patients with suspected 2009 H1N1 influenza A in a hospital in Norway, July - December 2009. *BMC Infect Dis*. 2011;11:75.

[18] Brink M, Hagberg L, Larsson A, Gedeberg R. Respiratory support during the influenza A (H1N1) pandemic flu in Sweden. *Acta Anaesthesiol Scand*. 2012;56:976-86.

[19] Buda S, Kopke K, Haas W. [Epidemiological characteristics of the influenza pandemic (H1N1) 2009 in Germany based on the mandatory notification of cases]. *Bundesgesundheitsblatt Gesundheitsforschung Gesundheitsschutz*. 2010;53:1223-30.

[20] Caler CL, Balsera EC, Lopez JLG, Saez RL. Severe acute respiratory failure in patients with influenza A (H1N1) virus infection admitted in intensive care. *Eur*. 2010;21:469.

[21] Campbell A, Rodin R, Kropp R, Mao Y, Hong Z, Vachon J, et al. Risk of severe outcomes among patients admitted to hospital with pandemic (H1N1) influenza. *Cmaj*. 2010;182:349-55.

[22] Centers for Disease C, Prevention. Hospitalized patients with novel influenza A (H1N1) virus infection - California, April-May, 2009. *MMWR Morb Mortal Wkly Rep*. 2009;58:536-41.

[23] Centers for Disease C, Prevention. 2009 pandemic influenza A (H1N1) virus infections - Chicago, Illinois, April-July 2009. *MMWR Morb Mortal Wkly Rep*. 2009;58:913-8.

[24] Chacko J, Gagan B, Ashok E, Radha M, Hemanth HV. Critically ill patients with 2009 H1N1 infection in an Indian ICU. *Indian J*. 2010;14:77-82.

[25] Chaiwarith R, Prommee N, Liwsrisakun C, Oberdorfer P, Nuntachit N, Pothirat C. A novel influenza A H1N1 clinical manifestations in patients at Chiang Mai University Hospital. *J Med Assoc Thai*. 2011;94:908-15.

[26] Chawla R, Kansal S, Chauhan M, Jain A, Jibhkate BN. Predictors of mortality and length of stay in hospitalized cases of 2009 influenza A (H1N1): Experiences of a tertiary care center. *Indian J*. 2013;17:275-82.

[27] Cheng AC, Kotsimbos T, Reynolds A, Bowler SD, Brown SG, Hancox RJ, et al. Clinical and epidemiological profile of patients with severe H1N1/09 pandemic influenza in Australia and New Zealand: an observational cohort study. *BMJ Open*. 2011;1:e000100.

[28] Chien Y-S, Su C-P, Tsai H-T, Huang AS, Lien C-E, Hung M-N, et al. Predictors and outcomes of respiratory failure among hospitalized pneumonia patients with 2009 H1N1 influenza in Taiwan. *J Infect*. 2010;60:168-74.

[29] Chowell G, Viboud C, Simonsen L, Miller MA, Acuna-Soto R. Mortality patterns associated with the 1918 influenza pandemic in Mexico: evidence for a spring herald wave and lack of preexisting immunity in older populations. *J Infect Dis*. 2010;202:567-75.

[30] Choy J, Draper A, Ribbons E, Vlahos I, Grubnic S, Bicanic T, et al. Assessment of acute illness severity and radiological extent identify patients at heightened risk of developing major pneumonic progression in influenza a H1N1/2009 infection. *Thorax*. 2010;65:A179-A80.

[31] Chudasama R, Patel U, Verma P, Banerjee A, Buch P, Patel P. A Two Wave Analysis of Hospitalizations and Mortality from Seasonal and Pandemic 2009 A (H1N1) Influenza in Saurashtra, India: 2009-2011. *ann*. 2013;3:334-40.

[32] Chudasama RK, Patel UV, Verma PB. Hospitalizations associated with 2009 influenza A (H1N1) and seasonal influenza in Saurashtra region, India. *Journal of Infection in Developing Countries*. 2010;4:834-41.

[33] Chudasama RK, Patel UV, Verma PB. Characteristics of Hospitalized Patients with Severe and Non-Severe Pandemic Influenza A (H1N1) in Saurashtra Region, India (Two Waves Analysis). *Journal of Family Medicine & Primary Care*. 2013;2:182-7.

[34] Chudasama RK, Patel UV, Verma PB, Agarwal P, Bhalodiya S, Dholakiya D. Clinical and epidemiological characteristics of 2009 pandemic influenza A in hospitalized pediatric patients of the Saurashtra region, India. *World J Pediatr*. 2012;8:321-7.

[35] Chudasama RK, Verma PB, Amin CD, Gohel B, Savariya D, Ninama R. Correlates of severe disease in patients admitted with 2009 pandemic influenza A (H1N1) infection in Saurashtra region, India. *Indian J*. 2010;14:113-20.

- [36] Creanga AA, Kamimoto L, Newsome K, D'Mello T, Jamieson DJ, Zotti ME, et al. Seasonal and 2009 pandemic influenza A (H1N1) virus infection during pregnancy: a population-based study of hospitalized cases. *Am J Obstet Gynecol.* 2011;204:S38-45.
- [37] Cullen G, Martin J, O'Donnell J, Boland M, Canny M, Keane E, et al. Surveillance of the first 205 confirmed hospitalised cases of pandemic H1N1 influenza in Ireland, 28 April - 3 October 2009.[Erratum appears in *Euro Surveill.* 2009;14(45) pii: 19398]. *Euro Surveill.* 2009;14.
- [38] Cutter JL, Ang LW, Lai FYL, Subramony H, Ma S, James L. Outbreak of pandemic influenza A (H1N1-2009) in Singapore, May to September 2009. *Ann Acad Med Singapore.* 2010;39:273-10.
- [39] Damak H, Chtara K, Bahloul M, Kallel H, Chaari A, Ksibi H, et al. Clinical features, complications and mortality in critically ill patients with 2009 influenza A(H1N1) in Sfax, Tunisia. *Influenza other respi.* 2011;5:230-40.
- [40] Dao CN, Kamimoto L, Nowell M, Reingold A, Gershman K, Meek J, et al. Adult hospitalizations for laboratory-positive influenza during the 2005-2006 through 2007-2008 seasons in the United States. *J Infect Dis.* 2010;202:881-8.
- [41] de Miguel-Diez J, Carrasco-Garrido P, Hernandez-Barrera V, Rodriguez-Rodriguez P, Puente-Maestu L, de Miguel AG, et al. Hospitalizations from pandemic influenza (pH1N1) infections among patients with asthma or COPD in Spain. *J Infect.* 2012;65:95-8.
- [42] Dee DL, Bensyl DM, Gindler J, Truman BI, Allen BG, D'Mello T, et al. Racial and ethnic disparities in hospitalizations and deaths associated with 2009 pandemic Influenza A (H1N1) virus infections in the United States. *Ann Epidemiol.* 2011;21:623-30.
- [43] Delgado-Rodriguez M, Castilla J, Godoy P, Martin V, Soldevila N, Alonso J, et al. Prognosis of hospitalized patients with 2009 H1N1 influenza in Spain: influence of neuraminidase inhibitors. *J Antimicrob Chemother.* 2012;67:1739-45.
- [44] Dolan GP, Myles PR, Brett SJ, Enstone JE, Read RC, Openshaw PJ, et al. The comparative clinical course of pregnant and non-pregnant women hospitalised with influenza A(H1N1)pdm09 infection. *PLoS ONE.* 2012;7:e41638.
- [45] D'Ortenzio E, Renault P, Jaffar-Bandjee MC, Gauzere BA, Lagrange-Xelot M, Fouillet A, et al. A review of the dynamics and severity of the pandemic A(H1N1) influenza virus on Reunion Island, 2009. (Lessons from the H1N1 influenza pandemic in French overseas territories and interim reports from metropolitan France.). *Clinical Microbiology and Infection.* 2010;16:309-16.
- [46] Echevarria-Zuno S, Mejia-Arangure JM, Mar-Obeso AJ, Grajales-Muniz C, Robles-Perez E, Gonzalez-Leon M, et al. Infection and death from influenza A H1N1 virus in Mexico: a retrospective analysis. *Lancet.* 2009;374:2072-9.
- [47] Estenssoro E, Rios FG, Apezteguia C, Reina R, Neira J, Ceraso DH, et al. Pandemic 2009 influenza A in Argentina: a study of 337 patients on mechanical ventilation. *Am J Respir Crit Care Med.* 2010;182:41-8.
- [48] Flint SM, Davis JS, Su J-Y, Oliver-Landry EP, Rogers BA, Goldstein A, et al. Disproportionate impact of pandemic (H1N1) 2009 influenza on Indigenous people in the Top End of Australia's Northern Territory. *Med J Aust.* 2010;192:617-22.
- [49] Fuhrman C, Bonmarin I, Bitar D, Cardoso T, Dupont N, Herida M, et al. Adult intensive-care patients with 2009 pandemic influenza A(H1N1) infection. *Epidemiol Infect.* 2011;139:1202-9.
- [50] Fuhrman C, Bonmarin I, Paty AC, Dupont N, Chiron E, Lucas E, et al. Severe hospitalised 2009 pandemic influenza A(H1N1) cases in France, 1 July-15 November 2009. *Euro Surveill.* 2010;15:14.
- [51] Gilca R, De Serres G, Boulianne N, Ouhoummane N, Papenburg J, Douville-Fradet M, et al. Risk factors for hospitalization and severe outcomes of 2009 pandemic H1N1 influenza in Quebec, Canada. *Influenza other respi.* 2011;5:247-55.
- [52] Gonzalez-Candelas F, Astray J, Alonso J, Castro A, Canton R, Galan JC, et al. Sociodemographic factors and clinical conditions associated to hospitalization in influenza A (H1N1) 2009 virus infected patients in Spain, 2009-2010. *PLoS ONE.* 2012;7:e33139.
- [53] Gordon CL, Johnson PDR, Permezel M, Holmes NE, Gutteridge G, McDonald CF, et al. Association between severe pandemic 2009 influenza A (H1N1) virus infection and immunoglobulin G(2) subclass deficiency. *Clin Infect Dis.* 2010;50:672-8.

- [54] Grasselli G, Bombino M, Patroniti N, Foti G, Benini A, Abbruzzese C, et al. Management of acute respiratory complications from influenza A (H1N1) infection: experience of a tertiary level Intensive Care Unit. *Minerva Anestesiol.* 2011;77:884-91.
- [55] Gutierrez-Pizarra A, Perez-Romero P, Alvarez R, Aydillo TA, Osorio-Gomez G, Milara-Ibanez C, et al. Unexpected severity of cases of influenza B infection in patients that required hospitalization during the first postpandemic wave. *J Infect.* 2012;65:423-30.
- [56] Harris JW. Influenza occurring in pregnant women: a statistical study of thirteen hundred and fifty cases. *JAMA : the journal of the American Medical Association.* 1919;72:978-80.
- [57] Harris PNA, Dixit R, Francis F, Buettner PG, Leahy C, Burgher B, et al. Pandemic influenza H1N1 2009 in north Queensland--risk factors for admission in a region with a large indigenous population. *Communicable Diseases Intelligence.* 2010;34:102-9.
- [58] Helferty M, Vachon J, Tarasuk J, Rodin R, Spika J, Pelletier L. Incidence of hospital admissions and severe outcomes during the first and second waves of pandemic (H1N1) 2009. *Cmaj.* 2010;182:1981-7.
- [59] Hernandez JE, Grainger J, Simonsen L, Collis P, Edelman L, Sheridan WP. Impact of the 2009/2010 influenza A (H1N1) pandemic on trends in influenza hospitalization, diagnostic testing, and treatment. *Influenza other respi.* 2012;6:305-8.
- [60] Hong KW, Cheong HJ, Choi WS, Lee J, Wie SH, Baek JH, et al. Clinical courses and outcomes of hospitalized adult patients with seasonal influenza in Korea, 2011-2012: Hospital-based Influenza Morbidity & Mortality (HIMM) surveillance. *J Infect Chemother.* 2014;20:9-14.
- [61] Hong SB, Choi EY, Kim SH, Suh GY, Park MS, Lee MG, et al. Epidemiological analysis of critically ill adult patients with pandemic influenza A(H1N1) in South Korea. *Epidemiol Infect.* 2013;141:1070-9.
- [62] Huang WT, Hsu YF, Kuo TW, Wu WJ, Chuang JH. Complicated pandemic (H1N1) 2009 during pregnancy, Taiwan. *Emerg Infect Dis.* 2011;17:1958-60.
- [63] Iorio AM, Camilloni B, Basileo M, Monaldi L, Lepri E, Neri M, et al. An Observational Retrospective Study Provide Information on Hospitalization and Severe Outcomes of the 2009 A(H1N1) Infection in Italy. *J Clin Med Res.* 2013;5:286-93.
- [64] Jahic R, Ahmetagic S, Porobic-Jahic H, Piljic D, Numanovic F. Predictors of the therapeutic response of patients with influenza A (H1N1) 2009 infection. *Med.* 2013;10:332-8.
- [65] Jain S, Kamimoto L, Bramley AM, Schmitz AM, Benoit SR, Louie J, et al. Hospitalized patients with 2009 H1N1 influenza in the United States, April-June 2009. *N Engl J Med.* 2009;361:1935-44.
- [66] Jamieson DJ, Honein MA, Rasmussen SA, Williams JL, Swerdlow DL, Biggerstaff MS, et al. H1N1 2009 influenza virus infection during pregnancy in the USA. *Lancet.* 2009;374:451-8.
- [67] Javadi AA, Ataei B, Khorvash F, Babak A, Rostami M, Mostafavizadeh K, et al. Clinical features of novel 2009 influenza a (H1N1) infection in Isfahan, Iran. *J.* 2011;16:1550-4.
- [68] Jimenez-Garcia R, Hernandez-Barrera V, Rodriguez-Rieiro C, Lopez de Andres A, de Miguel-Diez J, Jimenez-Trujillo I, et al. Hospitalizations from pandemic Influenza [A(H1N1)pdm09] infections among type 1 and 2 diabetes patients in Spain. *Influenza other respi.* 2013;7:439-47.
- [69] Kaya S, Yilmaz G, Arslan M, Oztuna F, Ozlu T, Koksali I. Predictive factors for fatality in pandemic influenza A (H1N1) virus infected patients. *Saudi Med J.* 2012;33:146-51.
- [70] Kelly H, Mercer G, Cheng A. Quantifying the risk of pandemic influenza in pregnancy and indigenous people in Australia in 2009. *Euro Surveill.* 2009;14.
- [71] Kelly PM, Kotsimbos T, Reynolds A, Wood-Baker R, Hancox B, Brown SGA, et al. FluCAN 2009: initial results from sentinel surveillance for adult influenza and pneumonia in eight Australian hospitals. *Med J Aust.* 2011;194:169-74.
- [72] Koegelenberg CFN, Irusen EM, Cooper R, Diacon AH, Taljaard JJ, Mowlana A, et al. High mortality from respiratory failure secondary to swine-origin influenza A (H1N1) in South Africa. *Qjm.* 2010;103:319-25.
- [73] Kojacic M, Kovacevic P, Bajramovic N, Batranovic U, Vidovic J, Aganovic K, et al. Characteristics and outcome of mechanically ventilated patients with 2009 H1N1 influenza in Bosnia and Herzegovina and Serbia: impact of newly established multidisciplinary intensive care units. *Croat Med J.* 2012;53:620-6.

- [74] Kuszniierz G, Uboldi A, Sosa G, Torales S, Colombo J, Moyano C, et al. Clinical features of the hospitalized patients with 2009 pandemic influenza A (H1N1) in Santa Fe, Argentina. *Influenza other respi.* 2013;7:410-7.
- [75] Kwan-Gett TS, Baer A, Duchin JS. Spring 2009 H1N1 influenza outbreak in King Country Washington. *Disaster Medicine and Public Health Preparedness.* 2009;3:S109-S16.
- [76] Lai AR, Keet K, Yong CM, Diaz JV. Severe H1N1-associated acute respiratory distress syndrome: A case series. *Am J Med.* 2010;123:282-5.e2.
- [77] Lehnert N, Geis S, Eisenbach C, Neben K, Schnitzler P. Changes in severity of influenza A(H1N1)pdm09 infection from pandemic to first postpandemic season, Germany. *Emerg Infect Dis.* 2013;19:748-55.
- [78] Lenzi L, Mello AM, Silva LR, Grochocki MH, Pontarolo R. Pandemic influenza A (H1N1) 2009: risk factors for hospitalization. *J Bras Pneumol.* 2012;38:57-65.
- [79] Lenzi L, Pontarolo R. Evaluation of pregnancy as a risk factor in the outcomes of influenza A (H1N1)/2009 in women of childbearing age. *Cad Saude Publica.* 2012;28:395-9.
- [80] Louie JK, Acosta M, Jamieson DJ, Honein MA, California Pandemic Working G. Severe 2009 H1N1 influenza in pregnant and postpartum women in California. *N Engl J Med.* 2010;362:27-35.
- [81] Louie JK, Acosta M, Winter K, Jean C, Gavali S, Schechter R, et al. Factors associated with death or hospitalization due to pandemic 2009 influenza A(H1N1) infection in California. *Jama.* 2009;302:1896-902.
- [82] Louie JK, Gavali S, Acosta M, Samuel MC, Winter K, Jean C, et al. Children hospitalized with 2009 novel influenza A(H1N1) in California. *Arch Pediatr Adolesc Med.* 2010;164:1023-31.
- [83] Louria DB, Blumenfeld HL, Ellis JT, Kilbourne ED, Rogers DE. Studies on influenza in the pandemic of 1957-1958. II. Pulmonary complications of influenza. *J Clin Invest.* 1959;38:213-65.
- [84] Louriz M, Mahraoui C, Azzouzi A, El Fassy Fihri MT, Zeggwagh AA, Abidi K, et al. Clinical features of the initial cases of 2009 pandemic influenza A (H1N1) virus infection in an university hospital of Morocco. *Int Arch Med.* 2010;3:26.
- [85] Macesic N, Kotsimbos TC, Kelly P, Cheng AC. Hospital-acquired influenza in an Australian sentinel surveillance system. *Med J Aust.* 2013;198:370-2.
- [86] Mahendra S, Afzal H, Saini GL, Suman B. Epidemiology of pandemic influenza A (H1N1) 2009 in Western Rajasthan, India: a retrospective study. *Scholars Journal of Applied Medical Sciences.* 2014;2:142-6.
- [87] Malonda RMC, Moran FG, Luna HV, Balibrea MMS, Rodrigo SG, Perez EP, et al. Pandemic influenza surveillance in the valencian community and seasonal influenza vaccines. [Spanish] *Vigilancia de la gripe pandemica en la comunidad valenciana y vacuna antigripal estacional. Rev Esp Salud Publica.* 2010;84:623-33.
- [88] Maravi-Poma E, Martin-Loeches I, Regidor E, Laplaza C, Cambra K, Aldunate S, et al. Severe 2009 A/H1N1v influenza in pregnant women in Spain. *Crit Care Med.* 2011;39:945-51.
- [89] Martin-Loeches I, Diaz E, Vidaur L, Torres A, Laborda C, Granada R, et al. Pandemic and post-pandemic influenza A (H1N1) infection in critically ill patients. *Crit Care.* 2011;15:R286.
- [90] Mehta AA, Kumar VA, Nair SG, F KJ, Kumar G, Singh SK. Clinical Profile of Patients Admitted with Swine-Origin Influenza A (H1N1) Virus Infection: An Experience from A Tertiary Care Hospital. *J Clin Diagn Res.* 2013;7:2227-30.
- [91] Mickiene A, Daniuseviciute L, Vanagaite N, Velyvyte D, Blauzdziuniene O, Nadisaukiene R, et al. Hospitalized adult patients with 2009 pandemic influenza A (H1N1) in Kaunas, Lithuania. *Medicina (Kaunas).* 2011;47:11-8.
- [92] Miller AC, Subramanian RA, Safi F, Sinert R, Zehtabchi S, Elamin EM. Influenza A 2009 (H1N1) virus in admitted and critically ill patients. *J Intensive Care Med.* 2012;27:25-31.
- [93] Mortensen E, Louie J, Pertowski C, Cadwell BL, Weiss E, Acosta M, et al. Epidemiology and outcomes of adults with asthma who were hospitalized or died with 2009 pandemic influenza A (H1N1)--California, 2009. *Influenza other respi.* 2013;7:1343-9.
- [94] Mulrennan S, Tempone SS, Ling IT, Williams SH, Gan GC, Murray RJ, et al. Pandemic influenza (H1N1) 2009 pneumonia: CURB-65 score for predicting severity and nasopharyngeal sampling for diagnosis are unreliable. *PLoS ONE.* 2010;5:e12849.

- [95] Nayman Alpat S, Usluer G, Ozgunes I, Doyuk Kartal E, Erben N. Clinical and Epidemiologic Characteristics of Hospitalized Patients with 2009 H1N1 Influenza Infection. *Influenza Res Treat.* 2012;2012:603989.
- [96] Nguyen-Van-Tam JS, Openshaw PJM, Hashim A, Gadd EM, Lim WS, Semple MG, et al. Risk factors for hospitalisation and poor outcome with pandemic A/H1N1 influenza: United Kingdom first wave (May-September 2009). *Thorax.* 2010;65:645-51.
- [97] Nickel KB, Marsden-Haug N, Lofy KH, Turnberg WL, Rietberg K, Lloyd JK, et al. Age as an independent risk factor for intensive care unit admission or death due to 2009 pandemic influenza A (H1N1) virus infection.[Erratum appears in *Public Health Rep.* 2011 Sep-Oct;126(5):624]. *Public Health Rep.* 2011;126:349-53.
- [98] Nicolay N, Callaghan MA, Domegan LM, Oza AN, Marsh BJ, Flanagan PC, et al. Epidemiology, clinical characteristics and resource implications of pandemic (H1N1) 2009 in intensive care units in Ireland. *Crit Care Resusc.* 2010;12:255-61.
- [99] Nin N, Soto L, Hurtado J, Lorente JA, Buroni M, Arancibia F, et al. Clinical characteristics and outcomes of patients with 2009 influenza A(H1N1) virus infection with respiratory failure requiring mechanical ventilation. *J Crit Care.* 2011;26:186-92.
- [100] Oh WS, Lee SJ, Lee CS, Hur JA, Hur AC, Park YS, et al. A prediction rule to identify severe cases among adult patients hospitalized with pandemic influenza A (H1N1) 2009. *J Korean Med Sci.* 2011;26:499-506.
- [101] Oliveira W, Carmo E, Penna G, Kuchenbecker R, Santos H, Araujo W, et al. Pandemic H1N1 influenza in Brazil: analysis of the first 34,506 notified cases of influenza-like illness with severe acute respiratory infection (SARI).[Erratum appears in *Euro Surveill.* 2009;14(43) pii: 19382]. *Euro Surveill.* 2009;14.
- [102] Orellano PW, Reynoso JI, Carlino O, Uez O. Protection of trivalent inactivated influenza vaccine against hospitalizations among pandemic influenza A (H1N1) cases in Argentina. *Vaccine.* 2010;28:5288-91.
- [103] Pano-Pardo JR, Rodriguez-Bano J, Martinez-Sanchez N, Viasus D, Farinas MC, Leyes M, et al. Prognosis of 2009 A(H1N1) influenza in hospitalized pregnant women in a context of early diagnosis and antiviral therapy. *Antivir Ther.* 2012;17:719-28.
- [104] Parcevaux M, Boisson V, Lemant J, Antok E, Thibault L, Garcia C, et al. [Outbreak of influenza A(H1N1)/2009: description of cases and crisis management in a ICU in Reunion Island]. *Ann Fr Anesth Reanim.* 2010;29:902-8.
- [105] Pecavar B, Nadrah K, Papst L, Cec V, Kotar T, Maticic M, et al. Clinical characteristics of adult patients with influenza-like illness hospitalized in general ward during Influenza A H1N1 pandemic 2009/2010. *Wien Klin Wochenschr.* 2011;123:662-7.
- [106] Phung H, Beard F, Selvey C, Appuhamy R, Birrell F. Surveillance of hospitalizations with pandemic A(H1N1) 2009 influenza infection in Queensland, Australia. *Western pac.* 2011;2:30-5.
- [107] Pires Neto Rda J, Lemos DR, Cavalcanti LP, Ramos Junior AN, Alencar CH, Facanha MC, et al. Pandemic influenza A (H1N1) 2009: epidemiological analysis of cases in a tropical/semi-arid region of Brazil. *Rev Soc Bras Med Trop.* 2013;46:141-6.
- [108] Poepl W, Hell M, Herkner H, Stoiser B, Fritsche G, Schurz-Bamieh N, et al. Clinical aspects of 2009 pandemic influenza A (H1N1) virus infection in Austria. *Infection.* 2011;39:341-52.
- [109] Poggensee G, Gilsdorf A, Buda S, Eckmanns T, Claus H, Altmann D, et al. The first wave of pandemic influenza (H1N1) 2009 in Germany: from initiation to acceleration. *BMC Infect Dis.* 2010;10:155.
- [110] Poulakou G, Souto J, Balcells J, Perez M, Laborda C, Roca O, et al. First influenza season after the 2009 pandemic influenza: Characteristics of ICU admissions in adults and children in vall D'hebron hospital. *Intensive Care Med.* 2011;37:S112.
- [111] Puvanalingam A, Rajendiran C, Sivasubramanian K, Ragananthanan S, Suresh S, Gopalakrishnan S. Case series study of the clinical profile of H1N1 swine flu influenza. *J Assoc Physicians India.* 2011;59:14-6, 8.
- [112] Quan-Tai X, Rui-Ping M, Feng Z, Gang W, Feng-Zhe C, Chun-Mei Q, et al. Analysis on risk factors of influenza A (H1N1). *Infectious Diseases in Clinical Practice.* 2011;19:187-91.
- [113] Riquelme R, Jimenez P, Videla AJ, Lopez H, Chalmers J, Singanayagam A, et al. Predicting mortality in hospitalized patients with 2009 H1N1 influenza pneumonia. *Int J Tuberc Lung Dis.* 2011;15:542-6.

- [114] Riquelme R, Riquelme M, Rioseco ML, Inzunza C, Gomez Y, Contreras C, et al. Characteristics of hospitalised patients with 2009 H1N1 influenza in Chile. *Eur Respir J*. 2010;36:864-9.
- [115] Rodriguez-Valero M, Prado Calleros HM, Bravo Escobar GA, Valdez Vazquez RR, Figueroa Moreno R, Martinez Montes G, et al. Difference between early clinical features of swine origin A H1N1 influenza confirmed and not confirmed infection in Mexico. *Journal of Infection in Developing Countries*. 2012;6:302-10.
- [116] Rolland-Harris E, Vachon J, Kropp R, Frood J, Morris K, Pelletier L, et al. Hospitalization of pregnant women with pandemic A(H1N1) 2009 influenza in Canada. *Epidemiol Infect*. 2012;140:1316-27.
- [117] Saleh P, Noshad H, Naghili B. Clinical manifestations of patients with novel H1N1 infection hospitalized in Infectious Disease ward, Sina Hospital, Tabriz, Iran. *Iranian Journal of Clinical Infectious Diseases*. 2010;5:200-5.
- [118] Saleh P, Noshad H, Naghili B. Demographic and paraclinical findings of patients with novel H1N1 infection hospitalized in infectious disease ward, Sina hospital, Tabriz, Iran. *Journal of Zanjan University of Medical Sciences and Health Services*. 2011;19.
- [119] Santa-Olalla Peralta P, Cortes Garcia M, Limia Sanchez A, Andres Prado J, Pachon Del Amo I, Sierra Moros MJ, et al. [Critically ill patients with 2009 pandemic influenza A (H1N1) infection in Spain: factors associated with death, April 2009-January 2010]. *Rev Esp Salud Publica*. 2010;84:547-67.
- [120] Santa-Olalla Peralta P, Cortes-Garcia M, Vicente-Herrero M, Castrillo-Villamandos C, Arias-Bohigas P, Pachon-del Amo I, et al. Risk factors for disease severity among hospitalised patients with 2009 pandemic influenza A (H1N1) in Spain, April - December 2009. *Euro Surveill*. 2010;15:23.
- [121] Satterwhite L, Mehta A, Martin GS. Novel findings from the second wave of adult pH1N1 in the United States. *Crit Care Med*. 2010;38:2059-61.
- [122] Sertogullarindan B, Ozbay B, Gunini H, Sunnetcioglu A, Arisoy A, Bilgin HM, et al. Clinical and prognostic features of patients with pandemic 2009 influenza A (H1N1) virus in the intensive care unit. *Afr Health Sci*. 2011;11:163-70.
- [123] Sevcen F, Ertem MM, Ozcullu N, Dorman V, Ormanl A, Kubat NK, et al. Retrospective evaluation of laboratory-confirmed and recovered cases of influenza A(H1N1)v. *Turkish Journal of Medical Sciences*. 2011;41:647-56.
- [124] Sevic BJ, Obradovic D, Batranovic U, Stojanovic M, Gmizic SS, Boskovic T. Influenza A (H1N1) - Past season's wonder flu in Vojvodina. *Influenza A (H1N1) - Cudo od gripa u Vojvodini proste sezone*. *Vojnosanit Pregl*. 2012;69:951-5.
- [125] Shaham D, Bogot NR, Aviram G, Guralnik L, Lieberman S, Copel L, et al. Severe influenza A (H1N1): the course of imaging findings. *Isr Med Assoc J*. 2011;13:591-6.
- [126] Shyam M, Tuhin D, Manish K, Harish A, Gagan M, Arvind M, et al. Clinical profile and mortality among novel influenza A (H1N1) infected patients: 2009-2010 Jodhpur, Rajasthan pandemic. *J Assoc Physicians India*. 2013;61:39-44.
- [127] Skarbinski J, Jain S, Bramley A, Lee EJ, Huang J, Kirschke D, et al. Hospitalized patients with 2009 pandemic influenza A (H1N1) virus infection in the United States--September-October 2009. *Clin Infect Dis*. 2011;52 Suppl 1:S50-9.
- [128] Subramony H, Lai FYL, Ang LW, Cutter JL, Lim PL, James L. An epidemiological study of 1348 cases of pandemic H1N1 influenza admitted to Singapore Hospitals from July to September 2009. *Ann Acad Med Singapore*. 2010;39:283-8.
- [129] Thompson DL, Jungk J, Hancock E, Smelser C, Landen M, Nichols M, et al. Risk factors for 2009 pandemic influenza A (H1N1)-related hospitalization and death among racial/ethnic groups in New Mexico. *Am J Public Health*. 2011;101:1776-84.
- [130] Tramuto F, Maida CM, Bonura F, Perna AM, Puzelli S, De Marco MA, et al. Surveillance of hospitalised patients with influenza-like illness during pandemic influenza A(H1N1) season in Sicily, April 2009-December 2010. *Euro Surveill*. 2011;16.
- [131] van 't Klooster TM, Wielders CC, Donker T, Isken L, Meijer A, van den Wijngaard CC, et al. Surveillance of hospitalisations for 2009 pandemic influenza A(H1N1) in the Netherlands, 5 June - 31 December 2009. *Euro Surveill*. 2010;15:14.

- [132] Vasoo S, Singh K, Trenholme GM. Predicting need for hospitalization of patients with pandemic (H1N1) 2009, Chicago, Illinois, USA. *Emerg Infect Dis.* 2010;16:1594-7.
- [133] Viasus D, Pano-Pardo JR, Pachon J, Campins A, Lopez-Medrano F, Villoslada A, et al. Factors associated with severe disease in hospitalized adults with pandemic (H1N1) 2009 in Spain. *Clin Microbiol Infect.* 2011;17:738-46.
- [134] Ward KA, Spokes PJ, McAnulty JM. Case-control study of risk factors for hospitalization caused by pandemic (H1N1) 2009. *Emerg Infect Dis.* 2011;17:1409-16.
- [135] Wilkinson K, Taylor G, Gravel D, Amihod B, Frenette C, McGeer A, et al. Laboratory confirmed seasonal influenza in adults in a network of Canadian hospitals 2006-2009. *Canadian Journal of Infectious Diseases and Medical Microbiology.* 2010;21:29A.
- [136] Woolston W, Conley DO. Epidemic pneumonia (Spanish Influenza) in pregnancy: effect of one hundred and one cases. *JAMA - Journal of the American Medical Association.* 1918;71:1898.
- [137] Xi X, Xu Y, Jiang L, Li A, Duan J, Du B, et al. Hospitalized adult patients with 2009 influenza A(H1N1) in Beijing, China: risk factors for hospital mortality. *BMC Infect Dis.* 2010;10:256.
- [138] Xu C, Iuliano AD, Chen M, Cheng PY, Chen T, Shi J, et al. Characteristics of hospitalized cases with influenza A (H1N1)pdm09 infection during first winter season of post-pandemic in China. *PLoS ONE.* 2013;8:e55016.
- [139] Yang S, Li X, Yu X, Qu J, Li H, Liu B, et al. Clinical analysis of obese patients with severe or critical 2009 pandemic influenza A. *Zhongguo Shiyong Neike Zazhi / Chinese Journal of Practical Internal Medicine.* 2013;33:372-80.
- [140] Yokota RT, Skalinski LM, Igansi CN, de Souza LR, Iser BP, Reis PO, et al. Risk factors for death from pandemic (H1N1) 2009, southern Brazil. *Emerg Infect Dis.* 2011;17:1467-71.
- [141] Yu H, Feng Z, Uyeki TM, Liao Q, Zhou L, Feng L, et al. Risk factors for severe illness with 2009 pandemic influenza A (H1N1) virus infection in China. *Clin Infect Dis.* 2011;52:457-65.
- [142] Zarogoulidis P, Glaros D, Kioumis I, Terzi E, Porpodis K, Tsiotsios A, et al. Clinical differences between influenza A (H1N1) virus and respiratory infection between the two waves in 2009 and 2010. *Int J Gen Med.* 2012;5:675-82.
- [143] Zarychanski R, Stuart TL, Kumar A, Doucette S, Elliott L, Kettner J, et al. Correlates of severe disease in patients with 2009 pandemic influenza (H1N1) virus infection. *Cmaj.* 2010;182:257-64.
- [144] Zhang PJ, Cao B, Li XL, Liang LR, Yang SG, Gu L, et al. Risk factors for adult death due to 2009 pandemic influenza A (H1N1) virus infection: a 2151 severe and critical cases analysis. *Chin Med J.* 2013;126:2222-8.
- [145] Zolotusca L, Jorgensen P, Popovici O, Pistol A, Popovici F, Widdowson MA, et al. Risk factors associated with fatal influenza, Romania, October 2009-May 2011. *Influenza other respi.* 2014;8:8-12.

Note: a couple of studies were published in several articles, thus, references of 145 articles with 142 datasets are provided.

**Supplementary Table 4: List of the 142 included studies with individual level data**

**Supplementary Figure 1: Forest plot for pregnancy as a risk factor for ICU admission following influenza**

**Supplementary Figure 2: Forest plot for pregnancy as a risk factor for ICU admission following influenza, sensitivity analysis including studies with non-pregnant women of reproductive age as comparator, only**

**Supplementary Figure 3: Forest plot for pregnancy as a risk factor for pneumonia following influenza**

**Supplementary Figure 4: Forest plot for pregnancy as a risk factor for receipt of mechanical ventilatory support following influenza**

**Supplementary Figure 5: Forest plot for pregnancy as a risk factor for ICU admission and/or death following influenza**

| Author                     | Study period | Country                           | Low/Middle Income Country | Study design    | Seasonality           | Predominant | Sample size | Laboratory confirmation | Newcastle-Ottawa Scale |
|----------------------------|--------------|-----------------------------------|---------------------------|-----------------|-----------------------|-------------|-------------|-------------------------|------------------------|
| Abdelaty                   |              | 2009 Saudi Arabia                 |                           | Cohort          | Pandemic              | H1N1        | 176         | Yes                     | 7                      |
| Adeniji                    | 2009/2010    | United Kingdom                    |                           | Cohort          | Pandemic              | H1N1        | 62          | Yes                     | 3                      |
| Adlhoc                     | 2009/2010    | Germany                           |                           | Cohort          | Pandemic              | H1N1        | 59          | Yes                     | 7                      |
| Agha                       |              | 2010 Saudi Arabia                 |                           | Cohort          | Pandemic              | H1N1        | 117         | Yes                     | 6                      |
| Ahmad                      |              | 2009 Oman                         |                           | Cohort          | Pandemic              | H1N1        | 55          | Yes                     | 7                      |
| Akinci                     | 2009         | Turkey                            | Yes                       | Cohort          | Pandemic              | H1N1        | 40          | Yes                     | 4                      |
| Akinci                     | 2009         | Turkey                            | Yes                       | Cohort          | Pandemic              | H1N1        | 113         | Yes                     | 7                      |
| Al-Lawati                  | 2009         | Oman                              |                           | Cohort          | Pandemic              | H1N1        | 131         | Yes                     | 6                      |
| Anonymous                  |              | 2009 Spain                        |                           | Cohort          | Pandemic              | H1N1        | 279         | Yes                     | 6                      |
| Athanasίου                 | 2010/2011    | Greece                            |                           | Cohort          | Seasonal              | H1N1        | 368         | Yes                     | 6                      |
| Ayatollahi                 | 2008/2009    | Iran                              | Yes                       | Cross-sectional | Pandemic              | H1N1        | 253         | Yes                     | 6                      |
| Barakat                    | 2009/2010    | Marocco                           | Yes                       | Cohort          | Pandemic              | H1N1        | 343         | Yes                     | 7                      |
| Bergman                    |              | 2009 USA                          |                           | Cohort          | Pandemic              | H1N1        | 29          | Yes                     | 6                      |
| Blakemore                  | 2009         | South Africa                      | Yes                       | Cohort          | Pandemic              | H1N1        | 7           | Yes                     | 5                      |
| Borse                      | 2010         | India                             | Yes                       | Cohort          | Pandemic              | H1N1        | 100         | Yes                     | 6                      |
| Brandsaeter                | 2009         | Norway                            |                           | Cohort          | Pandemic              | H1N1        | 64          | Yes                     | 6                      |
| Brink                      |              | 2010 Sweden                       |                           | Cohort          | Pandemic              | H1N1        | 126         | Yes                     | 7                      |
| Buda                       | 2009/2010    | Germany                           |                           | Cohort          | Pandemic              | H1N1        | 120,544     | Yes                     | 5                      |
| Caler                      | 2009         | Spain                             |                           | Cohort          | Pandemic              | H1N1        | 15          | Yes                     | 4                      |
| Campbell                   | 2009         | Canada                            |                           | Cohort          | Pandemic              | H1N1        | 1,479       | Yes                     | 5                      |
| CDC                        | 2009         | USA                               |                           | Cohort          | Pandemic              | H1N1        | 30          | Yes                     | 5                      |
| CDC                        | 2009         | USA                               |                           | Cohort          | Pandemic              | H1N1        | 1,557       | Yes                     | 5                      |
| Chacko                     | 2009         | India                             | Yes                       | Cohort          | Pandemic              | H1N1        | 31          | Yes                     | 5                      |
| Chaiwarith                 | 2009         | Thailand                          | Yes                       | Cohort          | Pandemic              | H1N1        | 278         | Yes                     | 7                      |
| Chawla                     | 2009/2010    | India                             | Yes                       | Cohort          | Pandemic              | H1N1        | 77          | Yes                     | 7                      |
| Cheng                      | 2009         | Australia and New Zealand         |                           | Cohort          | Seasonal and pandemic | H1N1        | 560         | Yes                     | 7                      |
| Chien                      | 2009         | Taiwan                            |                           | Cohort          | Pandemic              | H1N1        | 96          | Yes                     | 5                      |
| Chowell                    | 2009         | Mexico                            | Yes                       | Cohort          | Pandemic              | H1N1        | 2,944       | Yes                     | 8                      |
| Choy                       | 2009         | United Kingdom                    |                           | Cohort          | Pandemic              | H1N1        | 64          | Yes                     | 6                      |
| Chudasama                  | 2009-2011    | India                             | Yes                       | Cohort          | Seasonal and pandemic | H1N1        | 511         | Yes                     | 6                      |
| Chudasama (3 publications) | 2009/2010    | India                             | Yes                       | Cohort          | Pandemic              | H1N1        | 274         | Yes                     | 5                      |
| Creanga                    | 2009         | USA                               |                           | Cohort          | Pandemic              | H1N1        | 136         | Yes                     | 6                      |
| Creanga                    | 2005-2010    | USA                               |                           | Cohort          | Seasonal and pandemic | H1N1        | 2,216       | Yes                     | 7                      |
| Cullen                     | 2009         | Ireland                           |                           | Cohort          | Pandemic              | H1N1        | 205         | Yes                     | 6                      |
| Cutter                     | 2009         | Singapore                         |                           | Cohort          | Pandemic              | H1N1        | 1,348       | Yes                     | 5                      |
| Damak                      | 2009/2010    | Tunisia                           | Yes                       | Cohort          | Pandemic              | H1N1        | 32          | Yes                     | 6                      |
| Dao                        | 2005-2008    | USA                               |                           | Cohort          | Seasonal              | Influenza A | 5,055       | Yes                     | 7                      |
| de Miguel-Diez             | 2009         | Spain                             |                           | Cohort          | Pandemic              | H1N1        | 11,499      | No                      | 6                      |
| Dee                        | 2009         | New Zealand                       |                           | Cohort          | Pandemic              | H1N1        | 54          | Yes                     | 6                      |
| Delgado-Rodriguez          | 2009/2010    | Spain                             |                           | Cohort          | Pandemic              | H1N1        | 813         | Yes                     | 7                      |
| Dolan                      | 2009/2010    | United Kingdom                    |                           | Cohort          | Pandemic              | H1N1        | 395         | Yes                     | 7                      |
| D'Ortenzio                 | 2009         | Reunion Island                    |                           | Cohort          | Pandemic              | H1N1        | 283         | Yes                     | 5                      |
| Echavarria                 | 2009         | Argentina                         | Yes                       | Cohort          | Pandemic              | H1N1        | 275         | Yes                     | 4                      |
| Estenssoro                 | 2009         | Argentina                         | Yes                       | Cohort          | Pandemic              | H1N1        | 337         | Yes                     | 6                      |
| Flint                      | 2009         | Australia                         |                           | Cohort          | Pandemic              | H1N1        | 918         | Yes                     | 5                      |
| Fuhrman                    | 2009         | France                            |                           | Cohort          | Pandemic              | H1N1        | 758         | Yes                     | 5                      |
| Fuhrman                    | 2009/2010    | France                            |                           | Cohort          | Seasonal and pandemic | H1N1        | 1,065       | Yes                     | 7                      |
| Gilca                      | 2009         | Canada                            |                           | Case-Control    | Pandemic              | H1N1        | 716         | Yes                     | 5                      |
| Gonzalez-Candelas          | 2009/2010    | Spain                             |                           | Case-Control    | Pandemic              | H1N1        | 1,402       | Yes                     | 8                      |
| Gordon                     | 2009         | Australia                         |                           | Cohort          | Pandemic              | H1N1        | 39          | Yes                     | 6                      |
| Grasselli                  | 2009/2010    | Italy                             |                           | Cohort          | Pandemic              | H1N1        | 102         | Yes                     | 7                      |
| Gutierrez-Pizarra          | 2010/2011    | Spain                             |                           | Cohort          | Seasonal and pandemic | H1N1        | 130         | Yes                     | 6                      |
| Harris                     | 1918         | USA                               |                           | Cohort          | Pandemic              | H1N1        | 1,350       | Not described           | 4                      |
| Harris                     | 2009         | Australia                         |                           | Cohort          | Pandemic              | H1N1        | 181         | Yes                     | 6                      |
| Helferty                   | 2009/2010    | Canada                            |                           | Cohort          | Pandemic              | H1N1        | 8,678       | Yes                     | 6                      |
| Hernandez                  | 2009         | USA                               |                           | Cohort          | Pandemic              | H1N1        | 31          | Yes                     | 6                      |
| Hong                       | 2009/2010    | South Korea                       |                           | Cohort          | Pandemic              | H1N1        | 245         | Yes                     | 7                      |
| Hong                       | 2011/2012    | Korea                             |                           | Cohort          | Seasonal              | influenza A | 123         | Yes                     | 7                      |
| Huang                      | 2009         | Taiwan                            |                           | Cohort          | Pandemic              | H1N1        | 148         | Yes                     | 7                      |
| Iorio                      | 2009/2010    | Italy                             |                           | Cohort          | Pandemic              | H1N1        | 141         | Yes                     | 7                      |
| Jahic                      | 2009/2010    | Bosnia and Herzegovina            | Yes                       | Cohort          | Pandemic              | H1N1        | 119         | Yes                     | 7                      |
| Jain                       | 2009         | USA                               |                           | Cohort          | Pandemic              | H1N1        | 272         | Yes                     | 6                      |
| Jamieson                   | 2009         | USA                               |                           | Cohort          | Pandemic              | H1N1        | 34          | Yes                     | 6                      |
| Javadi                     | 2009/2010    | Iran                              | Yes                       | Cross-sectional | Pandemic              | H1N1        | 216         | Yes                     | 7                      |
| Jimenez-Garcia             | 2009         | Spain                             |                           | Cohort          | Pandemic              | H1N1        | 11,499      | Yes                     | 6                      |
| Kaya                       | 2009/2010    | Turkey                            | Yes                       | Cohort          | Pandemic              | H1N1        | 50          | Yes                     | 7                      |
| Kelly                      | 2009         | Australia                         |                           | Cohort          | Pandemic              | H1N1        | 4,992       | Yes                     | 3                      |
| Kelly                      | 2009         | Australia                         |                           | Cohort          | Pandemic              | H1N1        | 465         | Yes                     | 6                      |
| Koegelenberg               | 2009         | South Africa                      | Yes                       | Cohort          | Pandemic              | H1N1        | 19          | Yes                     | 6                      |
| Kojicic                    | 2010         | Bosnia and Herzegovina and Serbia | Yes                       | Cohort          | Pandemic              | H1N1        | 50          | Yes                     | 7                      |
| Kusznierz                  | 2009         | Argentina                         | Yes                       | Cohort          | Pandemic              | H1N1        | 242         | Yes                     | 7                      |
| Kwan-Gett                  | 2009         | USA                               |                           | Cohort          | Pandemic              | H1N1        | 565         | Yes                     | 7                      |
| Lai                        | 2009         | USA                               |                           | Cohort          | Pandemic              | H1N1        | 7           | Yes                     | 7                      |
| Lehners                    | 2009-2011    | Germany                           |                           | Cohort          | Seasonal and pandemic | H1N1        | 178         | Yes                     | 7                      |

|                      |           |                   |     |                 |                       |                    |        |     |   |
|----------------------|-----------|-------------------|-----|-----------------|-----------------------|--------------------|--------|-----|---|
| Lenzi                | 2010      | Brazil            | Yes | Cohort          | Pandemic              | H1N1               | 4,740  | Yes | 7 |
| Lenzi                | 2009      | Brazil            | Yes | Cross-sectional | Pandemic              | H1N1               | 1,861  | Yes | 7 |
| Louie 2009           | 2009      | USA               |     | Cohort          | Pandemic              | H1N1               | 1,088  | Yes | 6 |
| Louie 2010a          | 2009      | USA               |     | Cohort          | Pandemic              | H1N1               | 239    | Yes | 6 |
| Louie 2010b          | 2009      | USA               |     | Cohort          | Pandemic              | H1N1               | 345    | Yes | 6 |
| Louria               | 1957/1958 | USA               |     | Cohort          | Pandemic              | H2N2               | 33     | Yes | 6 |
| Louriz               | 2009      | Marocco           | Yes | Cohort          | Pandemic              | H1N1               | 186    | Yes | 6 |
| Macesic              | 2010/2011 | Australia         |     | Cohort          | Seasonal              | Not Reported/Mixed | 598    | Yes | 6 |
| Mahendra             | 2009/2010 | India             | Yes | Cohort          | Pandemic              | H1N1               | 685    | Yes | 7 |
| Malonda              | 2009      | Spain             |     | Cohort          | Pandemic              | H1N1               | 522    | Yes | 6 |
| Maravi-Poma          | 2009/2010 | Spain             |     | Cohort          | Pandemic              | H1N1               | 234    | Yes | 7 |
| Martin-Loeches       | 2009-2011 | Spain             |     | Cohort          | Seasonal and pandemic | H1N1               | 997    | Yes | 7 |
| Mehta                | 2009-2011 | India             | Yes | Cohort          | Seasonal and pandemic | H1N1               | 88     | Yes | 7 |
| Mickiene             | 2009/2010 | Lithuania         |     | Cohort          | Pandemic              | H1N1               | 121    | Yes | 7 |
| Miller               | 2009      | USA               |     | Cohort          | Pandemic              | H1N1               | 43     | Yes | 7 |
| Mortensen            | 2009      | USA               |     | Cohort          | Pandemic              | H1N1               | 170    | Yes | 6 |
| Mulrennan            | 2009      | Australia         |     | Cohort          | Pandemic              | H1N1               | 70     | Yes | 6 |
| Nayman Alpat         | 2009/2010 | Turkey            | Yes | Cohort          | Pandemic              | H1N1               | 106    | Yes | 7 |
| Nguyen               | 2009      | United Kingdom    |     | Cohort          | Pandemic              | H1N1               | 631    | Yes | 5 |
| Nickel               | 2009      | USA               |     | Cohort          | Pandemic              | H1N1               | 184    | Yes | 7 |
| Nicolay              | 2009/2010 | Ireland           |     | Cohort          | Pandemic              | H1N1               | 76     | Yes | 6 |
| Nin                  | 2009      | Chile and Uruguay |     | Cohort          | Pandemic              | H1N1               | 96     | Yes | 7 |
| Oh                   | 2009/2010 | Korea             |     | Cohort          | Pandemic              | H1N1               | 709    | Yes | 7 |
| Oliveira             | 2009      | Brazil            | Yes | Cohort          | Pandemic              | H1N1               | 5,747  | Yes | 5 |
| Orellano             | 2009      | Argentina         | Yes | Cohort          | Pandemic              | H1N1               | 6,866  | Yes | 7 |
| Pano-Pardo           | 2009      | Spain             |     | Cohort          | Pandemic              | H1N1               | 210    | Yes | 8 |
| Parcevaux            | 2009      | Reunion Island    |     | Cohort          | Pandemic              | H1N1               | 13     | Yes | 6 |
| Pecavar              | 2009/2010 | Slovenia          |     | Cohort          | Pandemic              | H1N1               | 66     | Yes | 7 |
| Peralta              | 2009/2010 | Spain             |     | Cohort          | Pandemic              | H1N1               | 1,043  | Yes | 6 |
| Phung                | 2009      | Australia         |     | Cohort          | Pandemic              | H1N1               | 1,236  | Yes | 7 |
| Pires Neto Rda       | 2009/2010 | Brazil            | Yes | Cohort          | Pandemic              | H1N1               | 143    | Yes | 7 |
| Poepl                | 2009/2010 | Austria           |     | Cross-sectional | Pandemic              | H1N1               | 540    | Yes | 7 |
| Poggensee            | 2009      | Germany           |     | Cohort          | Pandemic              | H1N1               | 53,968 | Yes | 6 |
| Poulakou             | 2009/2010 | Spain             |     | Cohort          | Seasonal and pandemic | H1N1               | 53     | Yes | 7 |
| Puvanalingam         | 2009/2010 | India             | Yes | Cohort          | Pandemic              | H1N1               | 442    | Yes | 7 |
| Quan-Tai             | 2009/2010 | China             | Yes | Cohort          | Pandemic              | H1N1               | 53     | Yes | 7 |
| Riquelme 2010        | 2009      | Chile             |     | Cohort          | Pandemic              | H1N1               | 100    | Yes | 6 |
| Riquelme 2011        | 2009      | 9 countries       |     | Cohort          | Pandemic              | H1N1               | 250    | Yes | 5 |
| Rodriguez            | 2010/2011 | Spain             |     | Cohort          | Seasonal              | H1N1               | 300    | Yes | 6 |
| Rodriguez-Valero     | 2009      | Mexico            | Yes | Cohort          | Pandemic              | H1N1               | 462    | Yes | 7 |
| Rolland-Harris       | 2009/2010 | Canada            |     | Cohort          | Pandemic              | H1N1               | 8,301  | Yes | 7 |
| Saleh                | 2010      | Iran              | Yes | Cohort          | Pandemic              | H1N1               | 40     | Yes | 7 |
| Santa-Olalla Peralta | 2009      | Spain             |     | Cohort          | Pandemic              | H1N1               | 3,025  | Yes | 6 |
| Satterwhite          | 2009      | USA               |     | Cohort          | Pandemic              | H1N1               | 109    | Yes | 6 |
| Sertogullarindan     | 2009      | Turkey            | Yes | Cohort          | Pandemic              | H1N1               | 20     | Yes | 6 |
| Sevencan             | 2009      | Turkey            | Yes | Cohort          | Pandemic              | H1N1               | 250    | Yes | 7 |
| Sevic                | 2009/2010 | Serbia            | Yes | Cohort          | Pandemic              | H1N1               | 64     | Yes | 7 |
| Shaham               | 2009      | Israel            |     | Cohort          | Pandemic              | H1N1               | 22     | Yes | 6 |
| Shyam                | 2009/2010 | India             | Yes | Cohort          | Pandemic              | H1N1               | 221    | Yes | 7 |
| Skarbinski           | 2009      | USA               |     | Cohort          | Pandemic              | H1N1               | 255    | Yes | 6 |
| Subramony            | 2008      | Singapore         |     | Cohort          | Pandemic              | H1N1               | 1,348  | Yes | 5 |
| Thompson             | 2009/2010 | USA               |     | Cross-sectional | Pandemic              | H1N1               | 926    | Yes | 7 |
| Tramoto              | 2009/2010 | Italy             |     | Cohort          | Seasonal and pandemic | H1N1               | 1,193  | Yes | 5 |
| van't Klooster       | 2009      | Netherlands       |     | Cohort          | Pandemic              | H1N1               | 2,181  | Yes | 4 |
| Vasoo                | 2009      | USA               |     | Cohort          | Pandemic              | H1N1               | 99     | Yes | 6 |
| Viasus               | 2009      | Spain             |     | Cohort          | Pandemic              | H1N1               | 585    | Yes | 7 |
| Ward                 | 2009      | Australia         |     | Case-Control    | Pandemic              | H1N1               | 302    | Yes | 5 |
| Wilkinson            | 2009/2010 | Canada            |     | Cohort          | Pandemic              | H1N1               | 1,083  | Yes | 7 |
| Woolston             | 1918      | USA               |     | Cohort          | Pandemic              | H1N1               | 2,154  | No  | 6 |
| Xi                   | 2009      | China             | Yes | Cohort          | Pandemic              | H1N1               | 155    | Yes | 7 |
| Xu                   | 2010/2011 | China             | Yes | Cohort          | Seasonal              | H1N1               | 701    | Yes | 7 |
| Yang                 | 2009      | China             | Yes | Cohort          | Pandemic              | H1N1               | 679    | Yes | 7 |
| Yokota               | 2009      | Brazil            | Yes | Cohort          | Pandemic              | H1N1               | 157    | Yes | 6 |
| Yu                   | 2009/2010 | China             | Yes | Cohort          | Pandemic              | H1N1               | 9,966  | Yes | 6 |
| Zarogoulidis         | 2010      | Greece            |     | Cohort          | Pandemic              | H1N1               | 106    | Yes | 7 |
| Zarychanski          | 2009      | Canada            |     | Case-Control    | Pandemic              | H1N1               | 795    | Yes | 6 |
| Zhang                | 2009      | China             | Yes | Cohort          | Pandemic              | H1N1               | 2,151  | Yes | 7 |
| Zolotusca            | 2009-2011 | Romania           | Yes | Cohort          | Seasonal and pandemic | H1N1               | 230    | Yes | 7 |

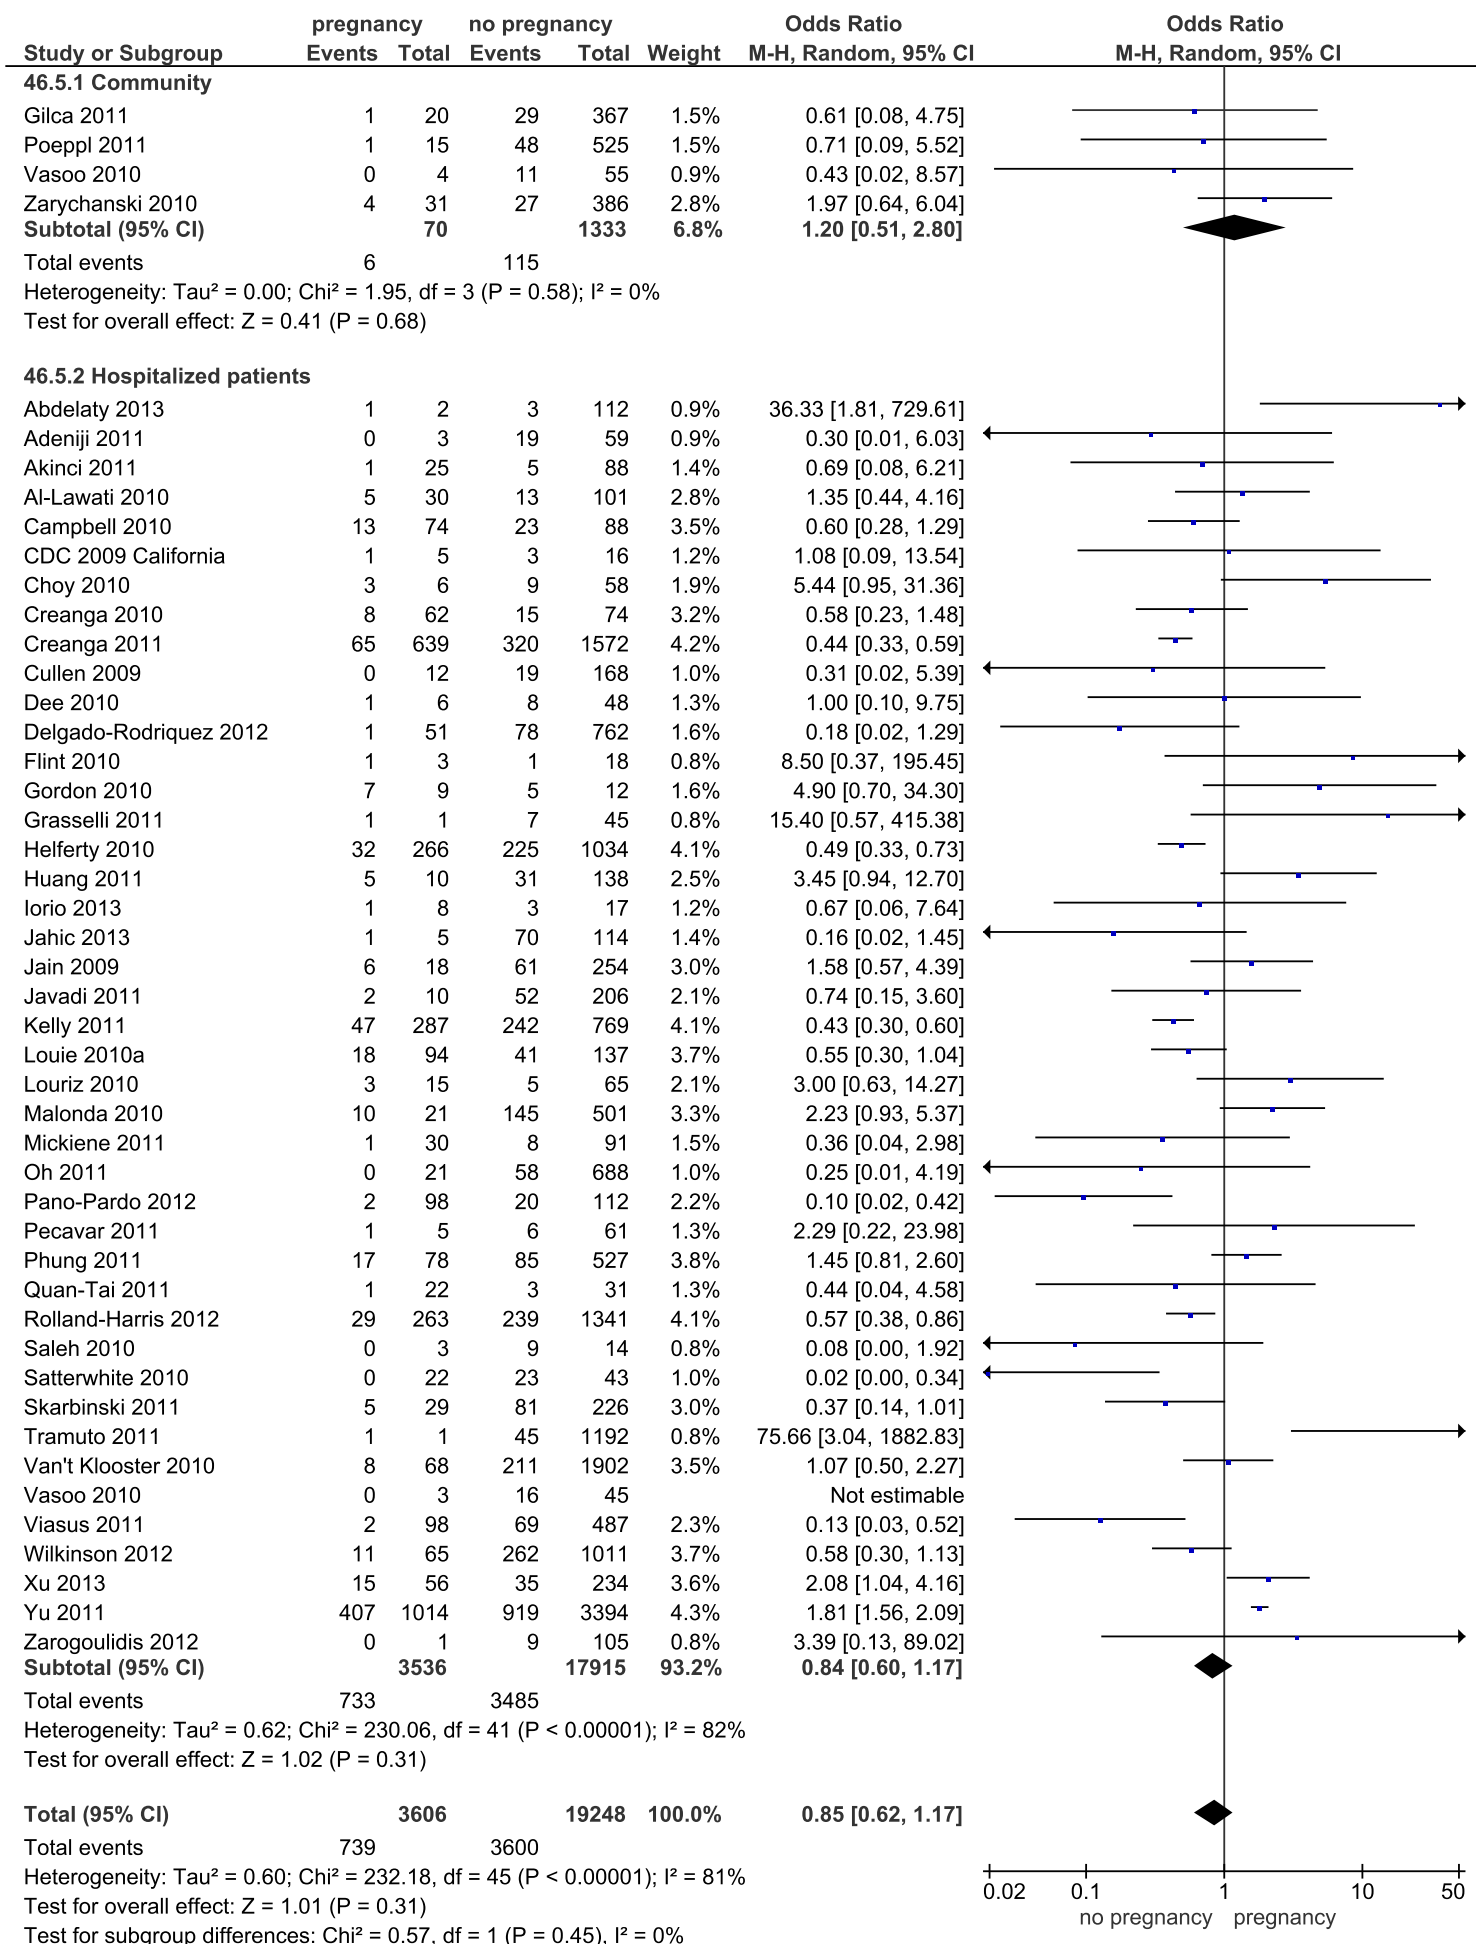

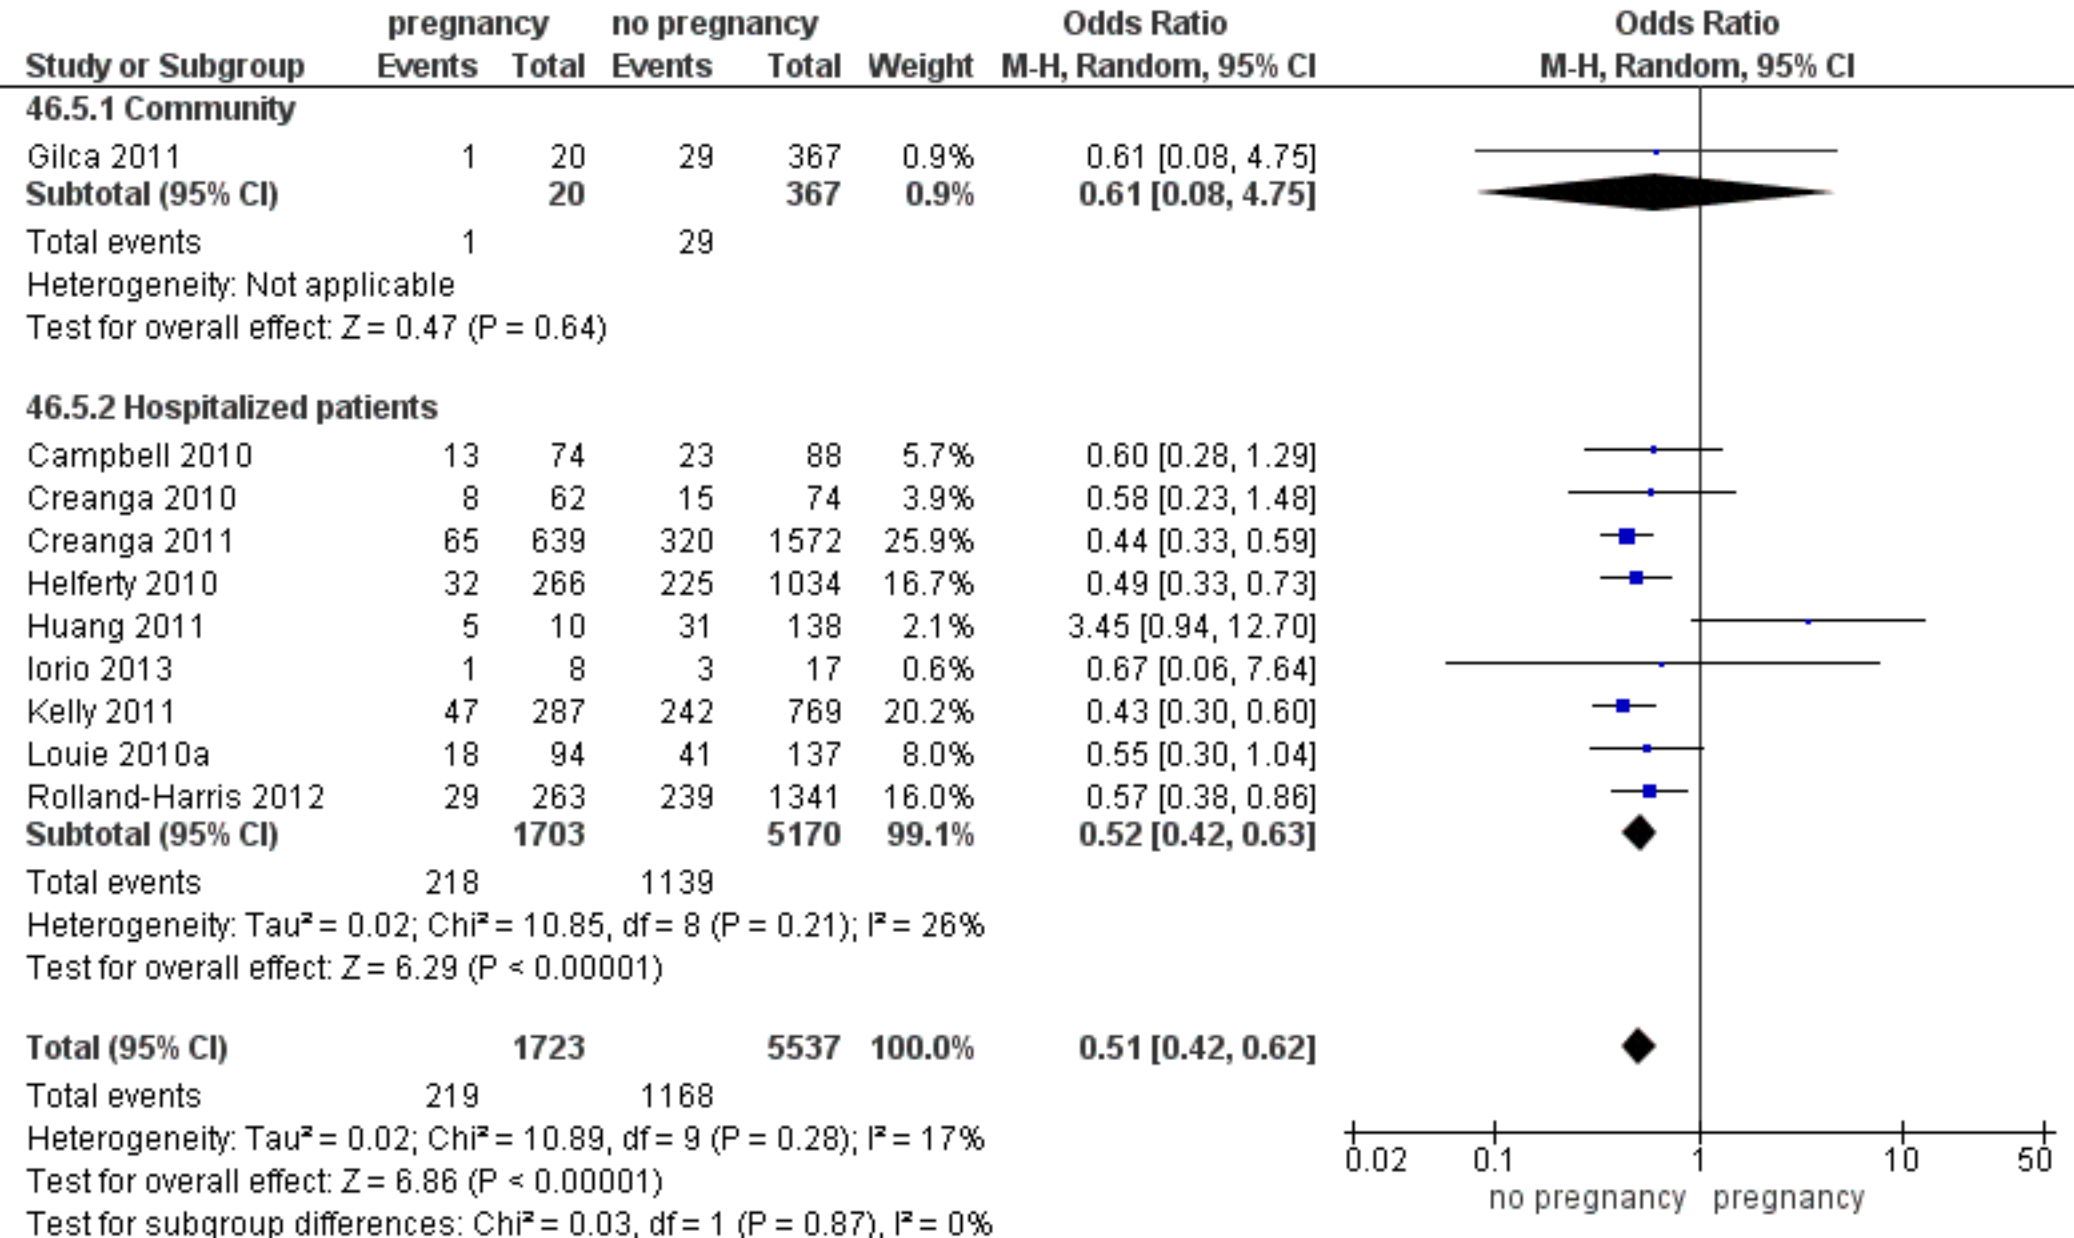

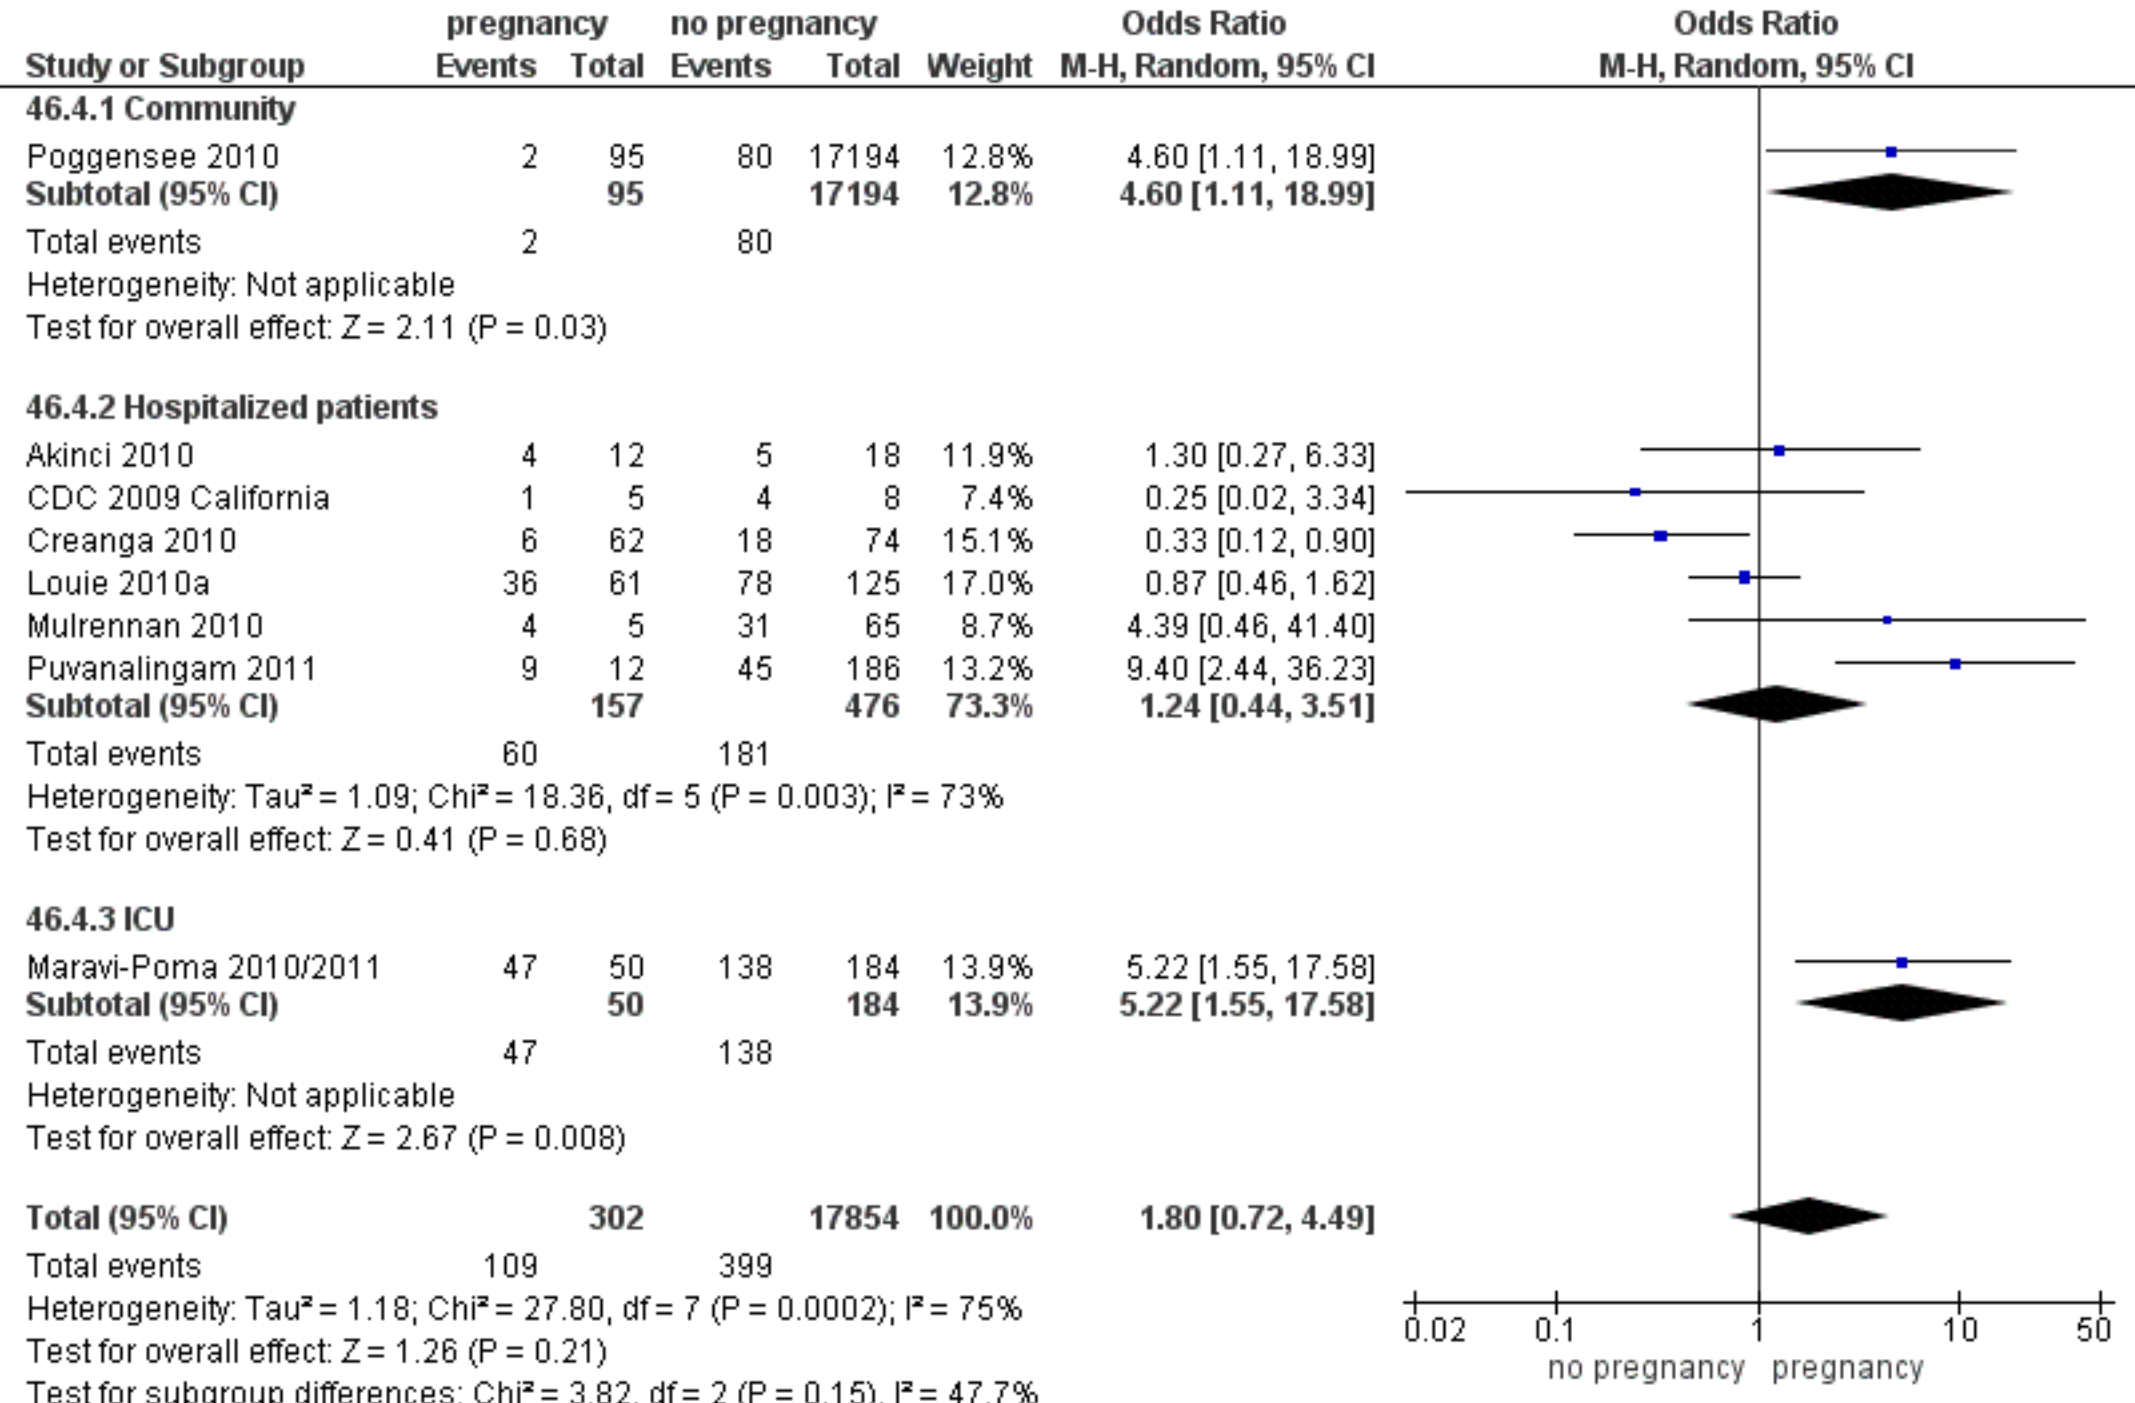

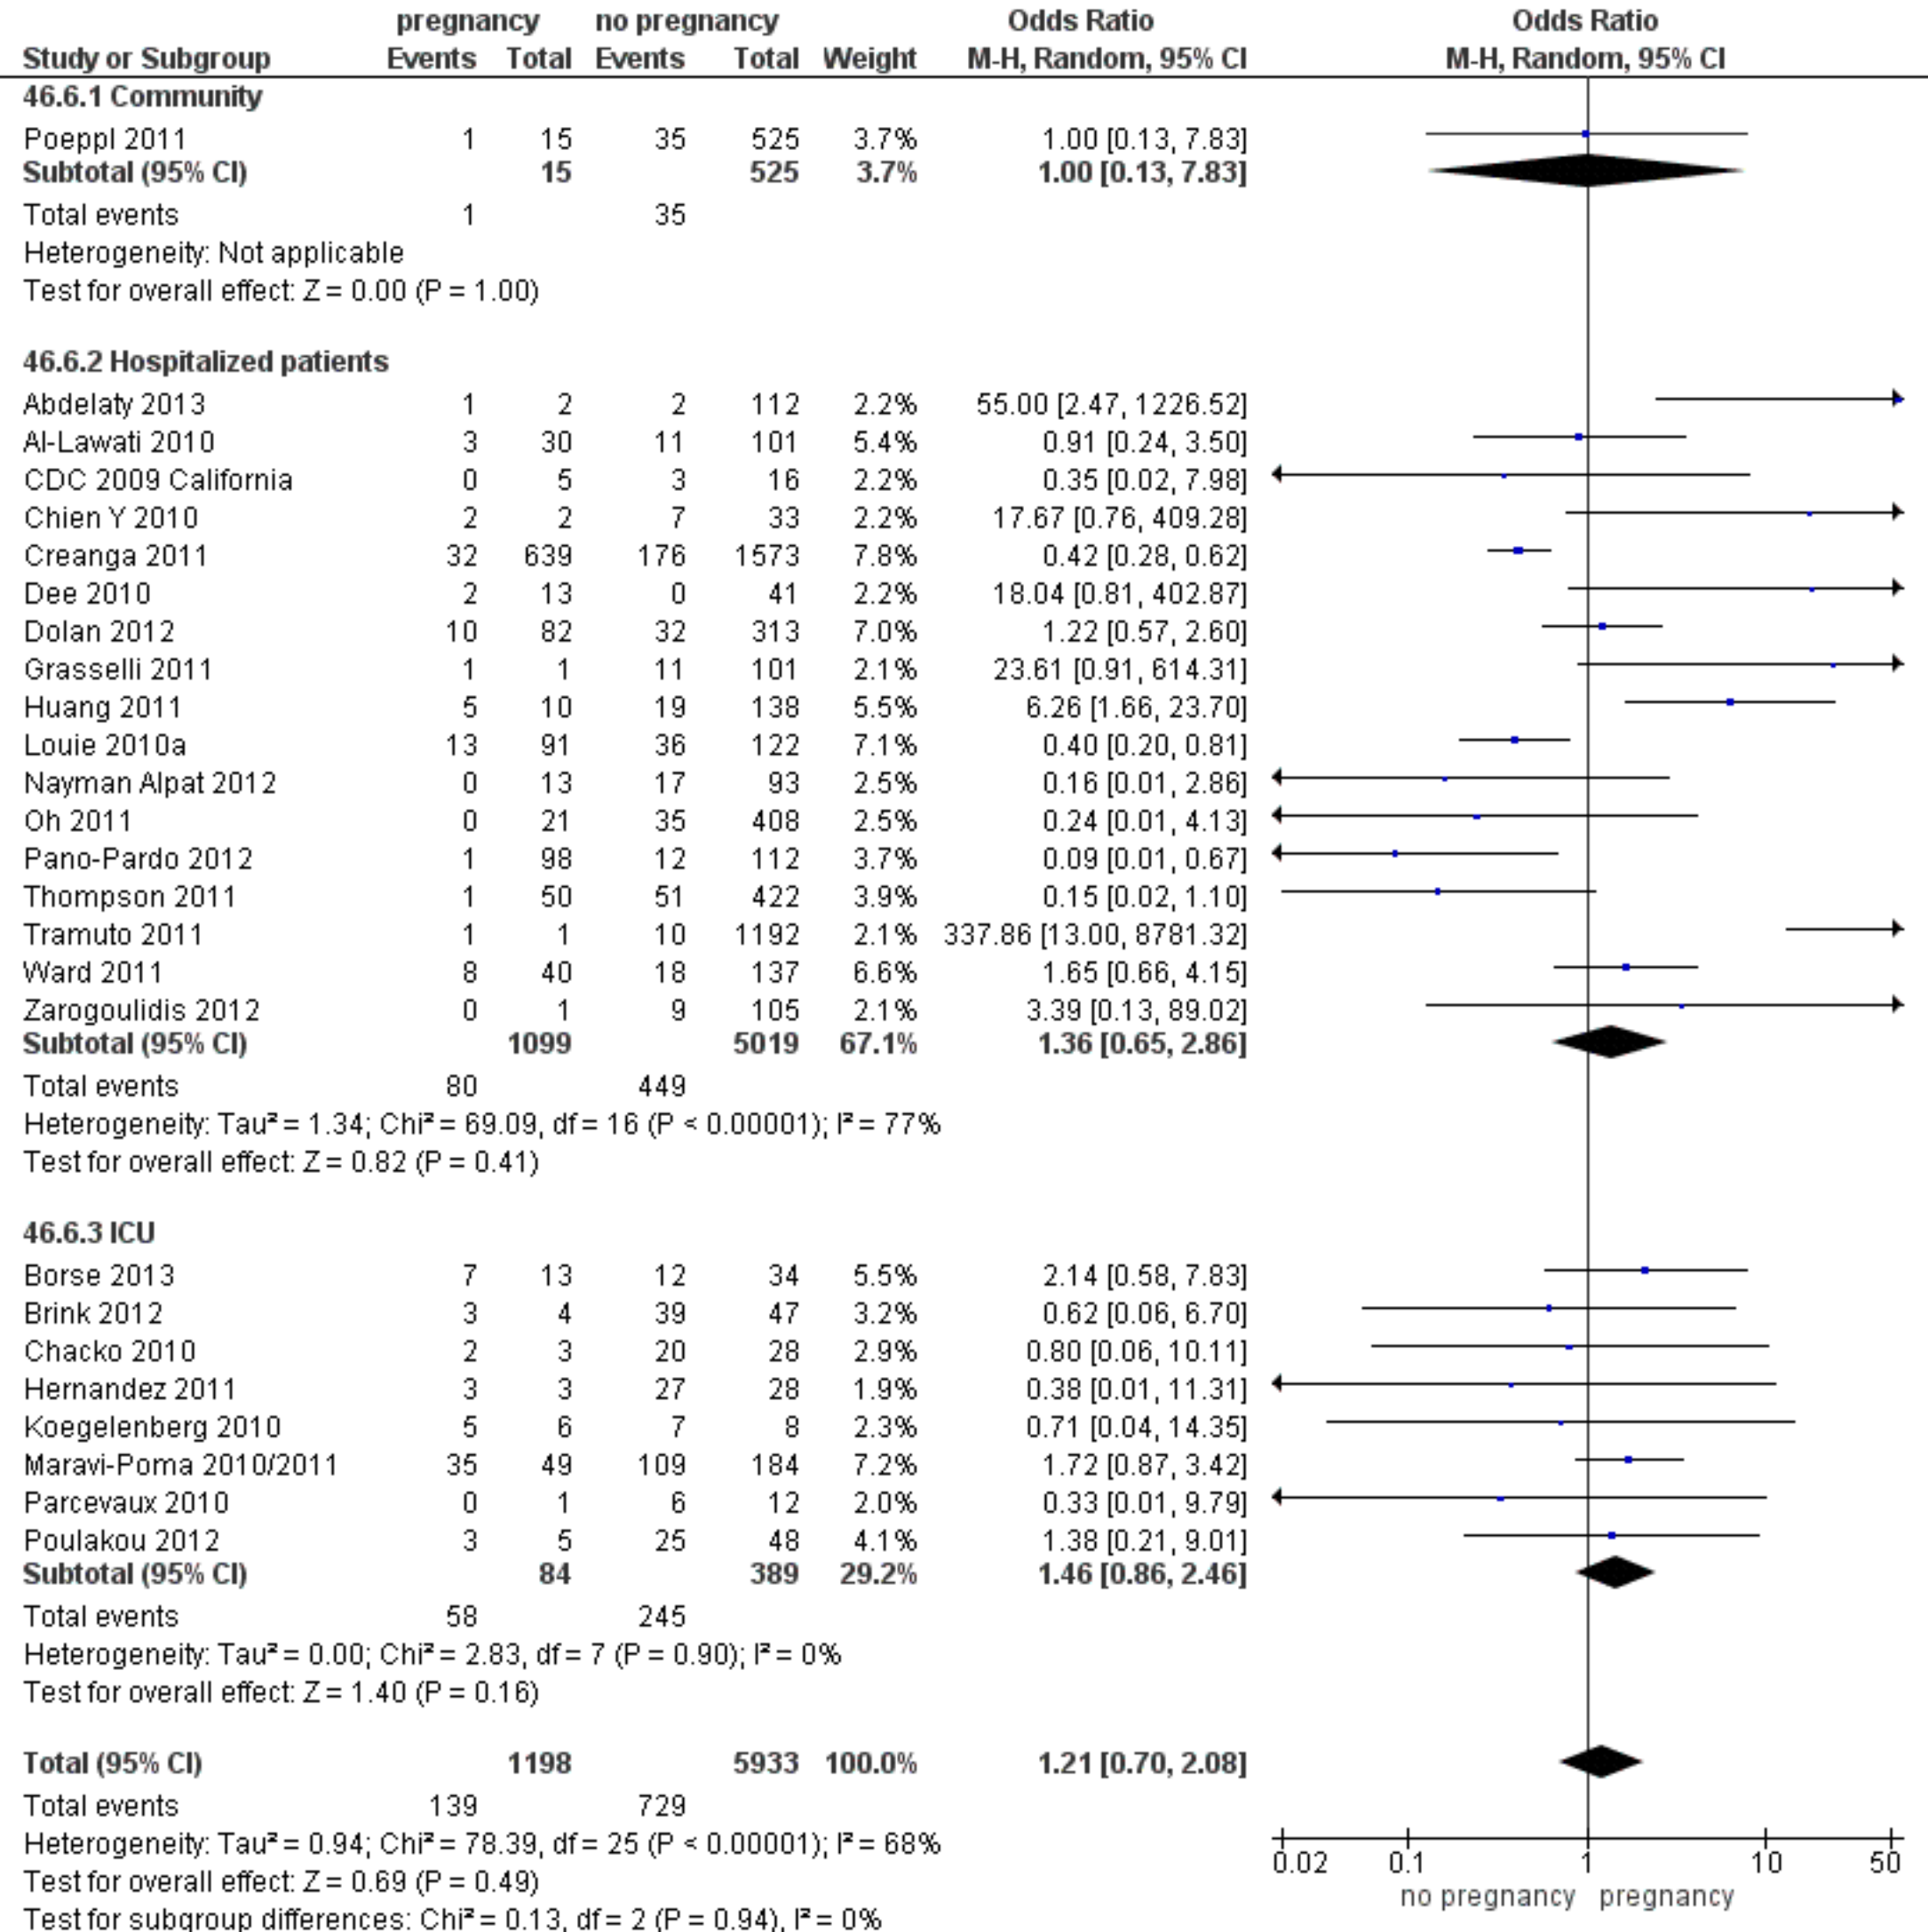

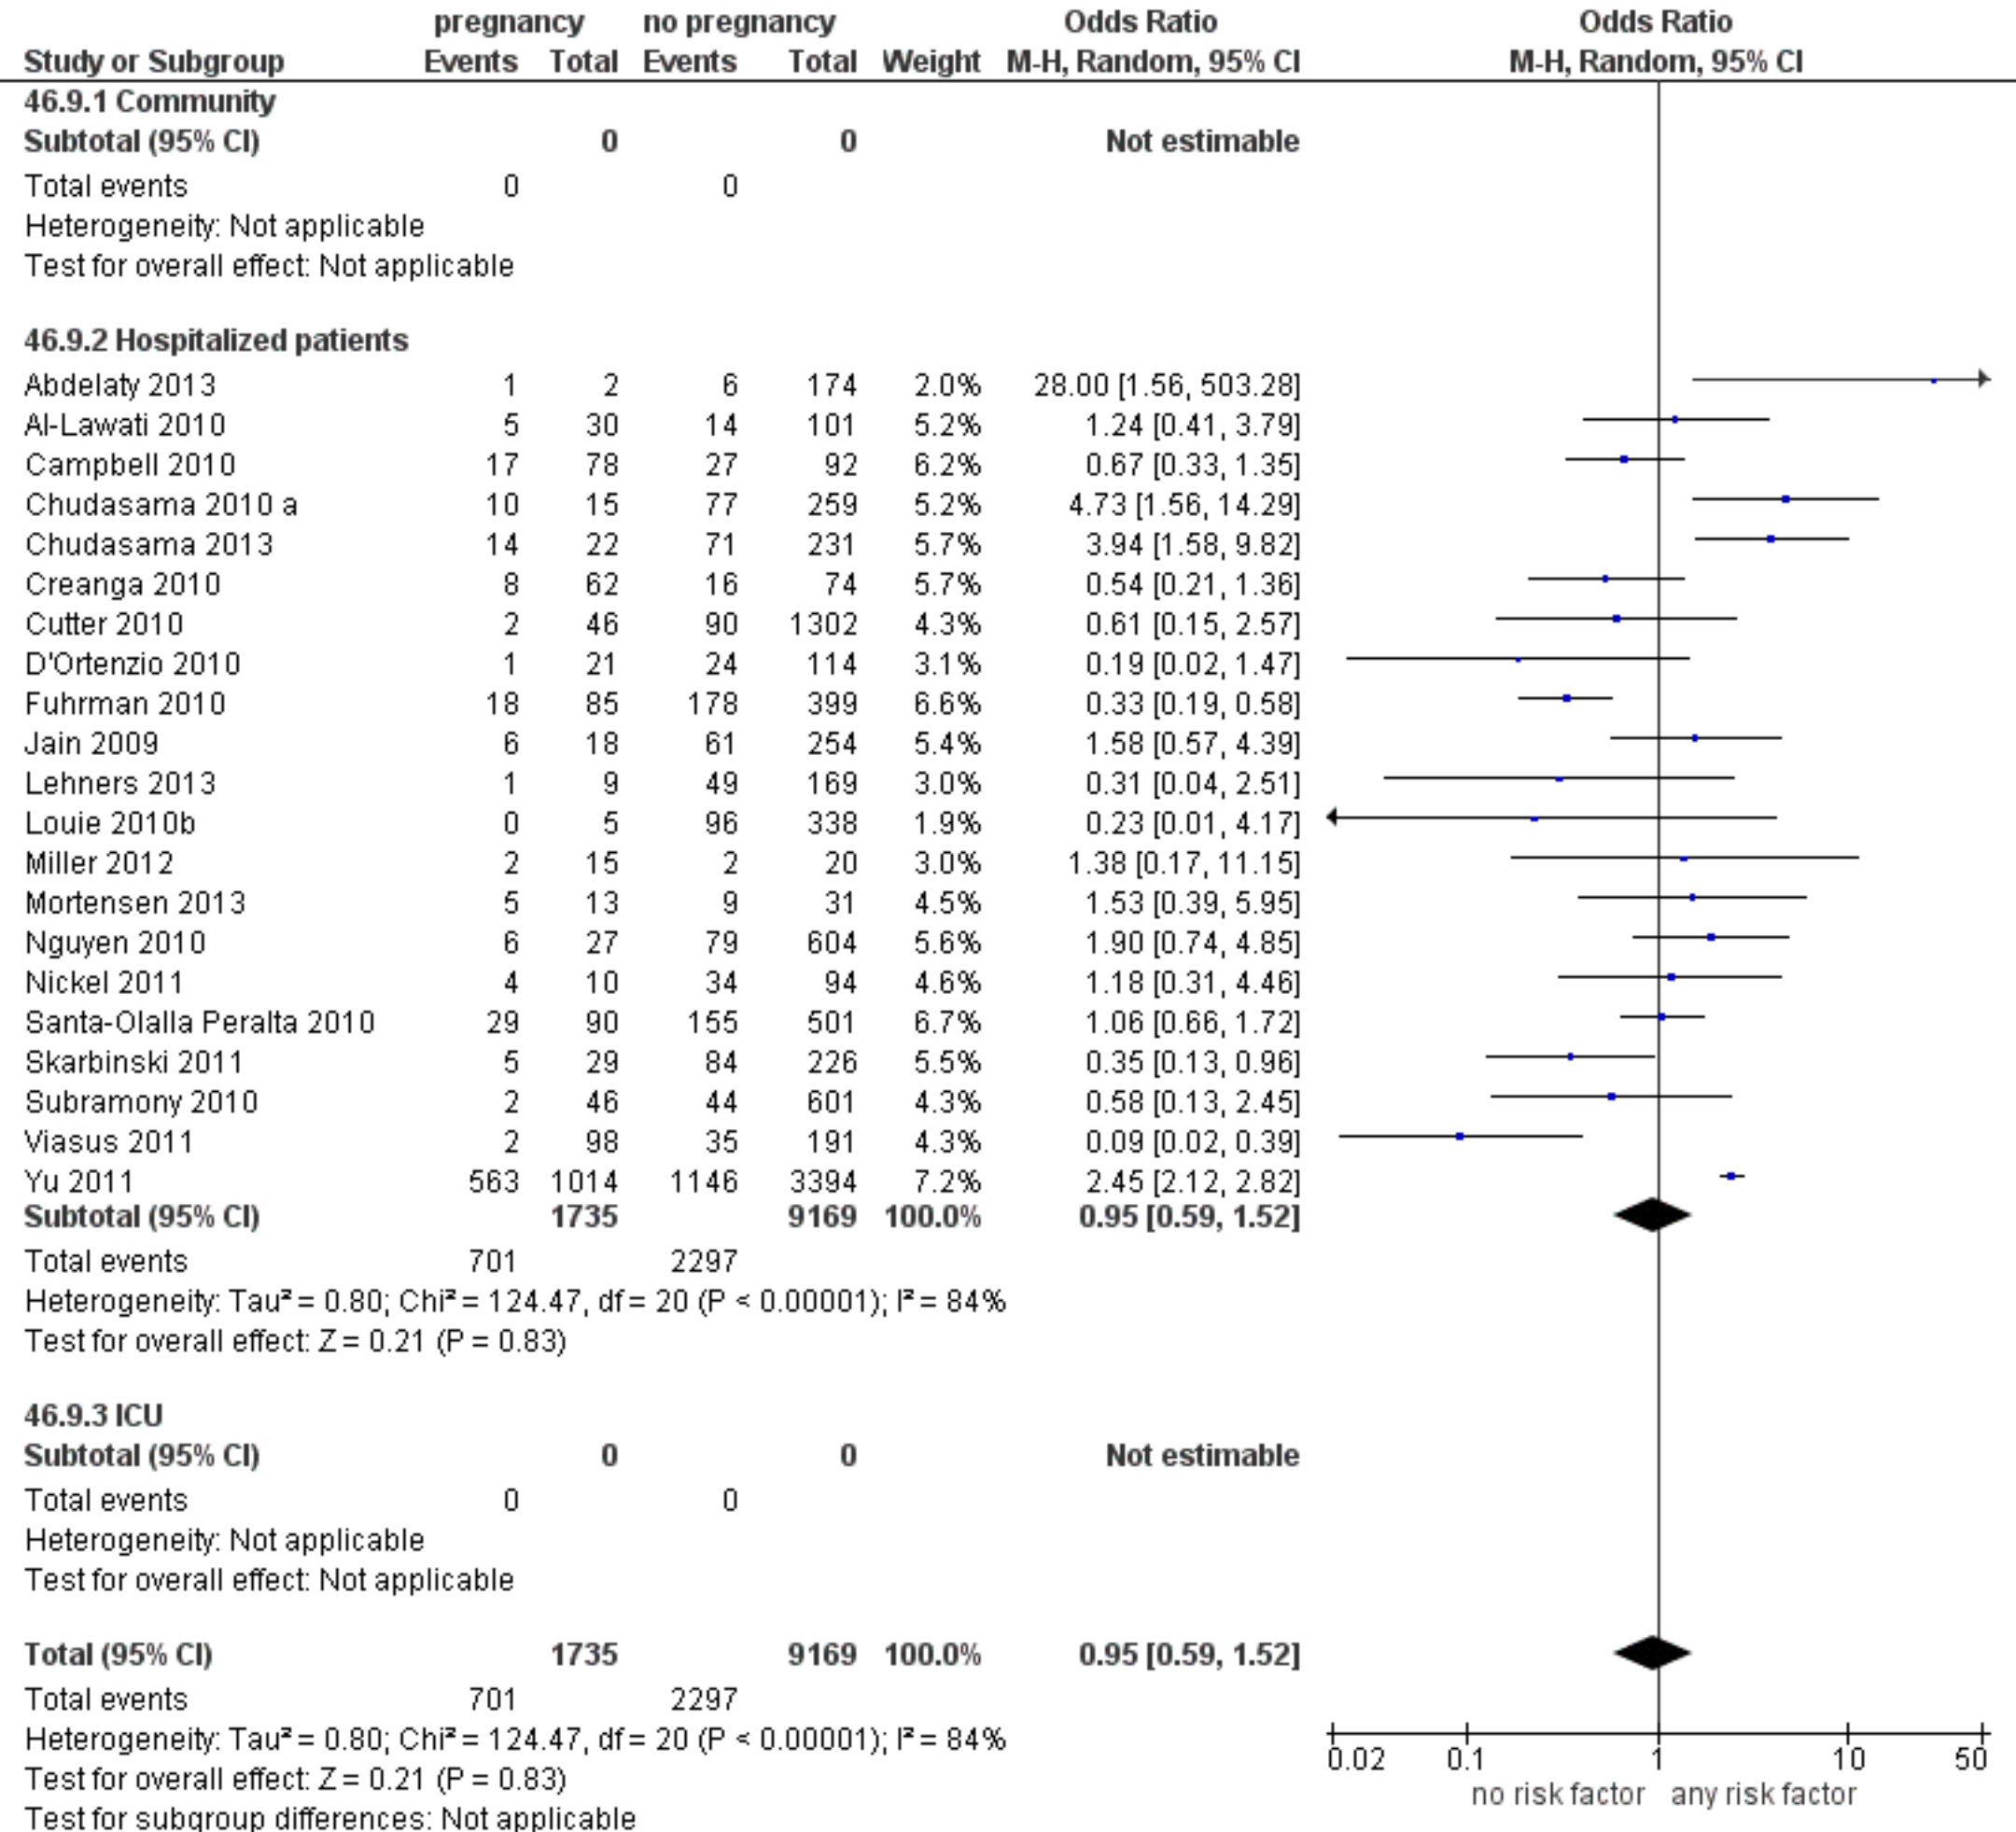

Supplement: mmc1 [file mmc1.pdf]
